# Supplementary material
Source: Research Square preprint supplement (doi:10.21203/rs.3.rs-9110539/v1)
Supplement: Supplementary file 1 [file 0c785544e294c5f51c657a75.docx]

**Supplementary File 2**

**Standardized Patient Scripts and Training Protocol**

1. **Overview**

This file contains the standardized patient (SP) scripts, role instructions, and training procedures used for the human-based simulation arm.

The SP scenarios were identical in clinical content, learning objectives, and assessment rubrics to those used in the AI simulation arm, ensuring methodological equivalence.

**2. Standardized Patient Roles**

| **Scenario** | **SP Role** |
| --- | --- |
| RUQ Pain & Jaundice | Mr. Khalid Ahmed |
| Headache | Ms. Sara Malik |
| Primary Infertility | Mrs. Ayesha Khan |
| Scanty Urine | Mr. Imran Shah |

**3. SP Script Template**

Each SP received a structured script including:

1. Demographic details
2. Chief complaint
3. History of presenting illness
4. Associated symptoms
5. Past medical history
6. Drug history
7. Psychosocial cues
8. Standardized answers to common questions

Example (RUQ pain scenario):

| **Component** | **Script** |
| --- | --- |
| Opening statement | “My eyes turned yellow and I have pain on the right side of my abdomen.” |
| Pain description | Dull ache for 5 days |
| Associated symptoms | Fever, nausea, loss of appetite |
| Risk factors | Dental extraction 6 weeks ago |
| Emotional tone | Mild anxiety |

This script ensured all students received the same clinical cues.

**4. SP Training Process**

Standardized patients underwent structured training including:

**Orientation Session**

- Study objectives
- Scenario background
- Learning outcomes

**Script Familiarization**

- Detailed walkthrough of scenario
- Clarification of expected responses

**Role Rehearsal**

- Practice sessions with faculty facilitators
- Mock OSCE simulations

**Calibration**

SPs were instructed to:

- Provide answers only when asked
- Maintain consistent emotional tone
- Avoid giving unsolicited diagnostic clues

Faculty observed rehearsals to ensure inter-actor consistency.

**5. Quality Assurance**

To minimize variability:

- SP responses were standardized across sessions.
- Faculty supervisors observed simulation rehearsals.
- Any deviations were corrected before the study began.

**6. Examiner Evaluation**

SP encounters were assessed using the same 20-mark OSCE checklist used in the AI simulation group to ensure comparability between modalities.
