# Supplementary material
Source: Research Square preprint supplement (doi:10.21203/rs.3.rs-9110539/v1)
Supplement: Supplementary file 2 [file 20671b22296ccaa7ae885a34.docx]

**Supplementary File 6**

**Interview Guide**

**Interview Questions for Students**

1. How realistic and responsive did you find the AI virtual patient compared to standardized patients?
2. How comfortable were you interacting with the AI virtual patient during your clinical training?
3. Did you trust the information and feedback provided by the AI virtual patient? Why or why not?
4. Were there any moments when the AI virtual patient’s responses felt unclear or inaccurate? Please explain.
5. Would you be willing to use AI virtual patients regularly for your clinical learning? Why or why not?
6. What concerns do you have about using AI virtual patients for your education?
7. What improvements would make the AI virtual patient more helpful or user-friendly for you?
8. Is there anything else you’d like to share about your experience?

**Interview Questions for Faculty**

1. How would you compare the realism and responsiveness of the AI virtual patient with that of standardized patients?
2. How comfortable are you with integrating AI virtual patients into your teaching or curriculum?
3. To what extent do you trust the clinical content and feedback provided by the AI virtual patient?
4. Have you noticed any limitations or inaccuracies in the AI virtual patient that concern you?
5. Would you recommend regular use of AI virtual patients for medical training? Why or why not?
6. What concerns do you have about using AI virtual patients in medical education?
7. What improvements or features would enhance the AI virtual patient as a teaching tool?
8. Is there anything else you would like to share about your experience or views?
