# Supplementary material
Source: Research Square preprint supplement (doi:10.21203/rs.3.rs-9110539/v1)
Supplement: Supplementary file 3 [file 2ef10412a303fa35ff1851c9.docx]

**Supplementary File 1**

**AI Virtual Patient Simulation Scenarios, Prompts, and Interaction Protocol**

**1. Overview**

This supplementary file provides the AI-driven virtual patient simulation materials used in the study. The simulations were conducted using ChatGPT (GPT-4) in an interactive role-play format where the AI acted as a standardized patient (SP) and subsequently as an examiner providing structured scoring.

Four clinical scenarios were developed:

1. Right Upper Quadrant Pain with Jaundice
2. Recurrent Headache
3. Primary Infertility
4. Scanty Urine / Acute Kidney Injury

Each scenario included:

- Scenario blueprint aligned with curriculum objectives
- AI standardized patient script
- System prompt used to control AI responses
- Interaction protocol for students
- OSCE evaluation rubric
- Associated Key Feature Problem (KFP) items

The scenarios were mapped to history-taking skills, clinical reasoning, communication, and diagnostic decision-making domains.

**2. Scenario Blueprinting**

| **Scenario** | **Clinical Focus** | **Core Competencies Assessed** | **Key Learning Outcomes** |
| --- | --- | --- | --- |
| RUQ Pain & Jaundice | Hepatobiliary disease | History taking, risk factor identification, diagnostic reasoning | Identify causes of acute hepatitis or biliary disease |
| Headache | Neurology | Pain analysis, red flag identification | Distinguish migraine vs secondary headache |
| Primary Infertility | Gynecology | Reproductive history, endocrine assessment | Recognize PCOS and infertility causes |
| Scanty Urine / AKI | Internal Medicine / Nephrology | Differential diagnosis, medication risk assessment | Identify prerenal vs renal vs postrenal AKI |

Each scenario was designed to require structured history-taking and clinical reasoning, rather than simple recall.

**3. AI Simulation Interaction Protocol**

Students interacted with the AI patient using a structured OSCE-style format.

**Candidate Instructions**

1. Introduce yourself and confirm patient identity.
2. Take a focused history based on the presenting complaint.
3. Ask relevant diagnostic questions.
4. Summarize key findings.
5. Suggest provisional diagnosis and investigations.
6. End interaction by stating “End of history.”

At that point, the AI switched to examiner mode and graded the student using the rubric.

**4. AI System Prompt (Standardized Across All Scenarios)**

You are ChatGPT acting as an AI Standardized Patient in an OSCE simulation.

Your role:
• Play the assigned patient realistically.
• Provide concise answers only when relevant questions are asked.
• Maintain natural conversation with appropriate emotional tone.
• Do not volunteer information unless asked.

When the student says “End of history”:
• Switch to Examiner Mode.
• Evaluate the student using the provided OSCE checklist.
• Provide a score out of 20.
• Give brief constructive feedback on strengths and missed points.

**5. Scenario Scripts**

**Scenario 1 — Right Upper Quadrant Pain with Jaundice**

Patient profile derived from OSCE materials ( OSCE Station Abdominal Pain).

| **Parameter** | **Details** |
| --- | --- |
| Name | Khalid Ahmed |
| Age | 28 years |
| Chief Complaint | Yellow discoloration of eyes and RUQ pain |
| Duration | 5 days |
| Pain | Dull ache, mild–moderate |
| Associated Symptoms | Fever, nausea, loss of appetite |
| Urine | Dark |
| Stool | Pale |
| Risk Factors | Dental extraction 6 weeks ago |
| Emotional State | Mild anxiety |

**Expected Diagnostic Focus**

- Viral hepatitis
- Hepatobiliary pathology

**Key Investigations Expected**

- Liver function tests
- Viral hepatitis serology
- Ultrasound abdomen

Associated KFP questions and scoring are described in the scenario assessment material (Pre Test KFPs Phase 1).

**Scenario 2 — Recurrent Headache**

Patient profile derived from OSCE materials (OSCE Station Headache).

| **Parameter** | **Details** |
| --- | --- |
| Name | Sara Malik |
| Age | 28 years |
| Occupation | Teacher |
| Duration | 3 months |
| Pain Character | Throbbing, unilateral |
| Associated Symptoms | Nausea, photophobia |
| Frequency | 2–3 episodes per week |
| Relieving Factors | Rest in dark room |
| Family History | Mother with similar headaches |

**Expected Diagnosis**

Migraine without aura

**Key Investigations**

- Blood pressure measurement
- Fundoscopy
- Neuroimaging if red flags present

Post-test diagnostic reasoning items correspond to migraine scenario assessment (Post Test Phase1).

**Scenario 3 — Primary Infertility**

Patient profile derived from OSCE materials (OSCE Station Infertility).

| **Parameter** | **Details** |
| --- | --- |
| Name | Ayesha Khan |
| Age | 32 |
| Marital Duration | 8 years |
| Chief Complaint | Unable to conceive |
| Menstrual Pattern | Every 3–4 months |
| Additional Features | Weight gain, facial hair |
| Emotional State | Distressed about infertility |

**Expected Diagnosis**

Polycystic ovarian syndrome (PCOS)

**Key Investigations**

- Hormonal profile (LH, FSH, TSH, prolactin)
- Pelvic ultrasound
- Semen analysis

**Scenario 4 — Scanty Urine / Acute Kidney Injury**

Patient profile derived from OSCE materials (OSCE Station Scanty Urine).

| **Parameter** | **Details** |
| --- | --- |
| Name | Imran Shah |
| Age | 55 |
| Chief Complaint | Reduced urine output |
| Duration | 2 days |
| Associated History | Diarrhea last week |
| Drugs | Ibuprofen, ACE inhibitor |
| Comorbidity | Hypertension |

**Expected Diagnosis**

Prerenal acute kidney injury.

**Key Investigations**

- Serum creatinine and urea
- Electrolytes
- Urinalysis
- Ultrasound KUB

Associated diagnostic reasoning questions correspond to AKI KFP assessment scenarios (KFPs Pre and Post Phase 2).

**6. Assessment Rubric**

Each scenario used a 20-mark structured OSCE rubric, assessing:

| **Domain** | **Marks** |
| --- | --- |
| Communication & professionalism | 2 |
| History taking | 8 |
| Identification of red flags | 3 |
| Diagnostic reasoning | 3 |
| Investigations & management | 4 |
| Total | 20 |

**7. Standardization Measures**

To ensure consistency:

- AI prompts were locked after pilot testing.
- Response boundaries were defined in the system prompt.
- AI responses were restricted to scenario-specific information.
- Examiner scoring rubric remained identical for all participants.
