# Supplementary material
Source: Research Square preprint supplement (doi:10.21203/rs.3.rs-9110539/v1)
Supplement: Supplementary file 4 [file 60065f190b10a778ecff6ebe.docx]

**Supplementary File 3**

**KFPS Pre Test ( Phase 1 )**

**Scenario 1:** Mr. Khalid Ahmed, a 28-year-old man, presents with yellow discoloration of eyes and skin for 5 days, along with dull right upper quadrant (RUQ) pain. He also reports mild fever, nausea, and loss of appetite. His urine is dark, and stool is pale. He denies previous jaundice. There is a history of a dental extraction 6 weeks ago.

**Q1.** Which of the following are possible causes of this presentation? (2 marks)
a. Gallstone disease
b. Acute viral hepatitis B
c. Hemolytic anemia
d. Drug-induced hepatitis

**Answer key:** Acute viral hepatitis B (1) + Gallstone disease (1)

**Q2**. Write any **three historical features** that help you determine the underlying cause (3 marks).

**Answer Key:**

- Recent risk exposure
- Dark urine and pale stool
- Fever, nausea, anorexia, malaise
  (1 mark each)

**Q3. (MCQ – 3 marks)**
Which tests would be most useful for confirmation?
☐ Liver function tests
☐ Abdominal ultrasound
☐ Chest X-ray
☐ Viral serology
**Answer key:** LFTs (1) + Ultrasound (1) + Serology (1)

**Scenario 2:**  Mr. Khalid’s vital signs are stable. He has no history of drug abuse or blood transfusion. You suspect a hepatocellular cause of jaundice.

**Question 1**
List three important investigations you would order to confirm your diagnosis. (3 marks)

**Answer Key:**

- Liver function tests (LFTs)
- Viral hepatitis serology (HBsAg, Anti-HAV IgM, Anti-HCV)
- Ultrasound abdomen
  (1 mark each)

**Question 2**: Which findings best confirm acute viral involvement? (2 marks)
☐ Positive HBsAg or HAV IgM
☐ Elevated ALT/AST
☐ Low albumin
☐ High creatinine
**Answer key:** HBsAg/HAV IgM (1) + ALT/AST ↑ (1)

**Question 3**
Name one red flag feature in such patients that would require urgent hospital admission. (1 mark)

**Answer Key:**

- Altered mental status / hepatic encephalopathy OR
- Prolonged bleeding / coagulopathy
  **Score:** 1

**Scenario 3:**  Mrs. Ayesha Khan, a 32-year-old woman, has been married for eight years and has never conceived. Her menses are light and occur every 3–4 months. She reports gradual weight gain and facial hair growth over the last five years. No history of pelvic infection or galactorrhoea.

**Q1. (MCQ – 1 mark)**
Select the most probable diagnosis.
☐ Polycystic ovary syndrome
☐ Premature ovarian failure
☐ Hypothyroidism
☐ Hyperprolactinemia
**Answer key:** PCOS (1)

**Question 2**
List three key historical features that support this diagnosis. (3 marks)

**Answer Key:**

- Oligomenorrhoea (menses every 3–4 months)
- Weight gain
- Hirsutism (facial hair growth)
  **Score:** 3 (1 mark each)

**Q3. (MCQ – 2 marks)**
Which other conditions may cause infertility?
☐ Tubal blockage
☐ Thyroid dysfunction
☐ Endometriosis
☐ Pelvic fracture
**Answer key:** Tubal blockage (1) + Thyroid dysfunction (1)

**Scenario 4:**  The same patient seeks advice on what tests she should undergo to identify the reason for her infertility.

**Question 1**
List three initial investigations that you would order for this patient. (3 marks)

**Answer Key:**

- Hormonal profile (LH, FSH, TSH, prolactin)
- Pelvic ultrasound (for polycystic ovaries)
- Semen analysis of husband
  **Score:** 3 (1 mark each)

**Question 2**
What key finding in the hormonal profile would support your suspected diagnosis? ( 1 mark)

**Answer Key:** Elevated LH:FSH ratio (>2:1)
**Score:** 1

**Question 3**
Mention additional non-invasive tests that could help evaluate ovulation status. (2 marks)

☐ Mid-luteal serum progesterone
☐ Basal body temperature charting
☐ Endometrial biopsy
☐ Hysterosalpingogram
**Answer key:** Progesterone (1) + BBT chart (1)

**Scenario 5:**  Sara Malik, a 28-year-old schoolteacher, presents to the Neurology OPD with a 3-month history of recurrent right-sided throbbing headaches. Each episode lasts about 4–6 hours and occurs two to three times per week. The pain is associated with nausea and sensitivity to light and sound. Resting in a dark room provides relief. She denies fever, neck stiffness, or visual loss. Her neurological examination and blood pressure are normal.

**Question 1**
What is the most likely diagnosis in this case? (1 mark)
Identify the most probable diagnosis.
☐ Tension-type headache
☐ Migraine without aura
☐ Cluster headache
☐ Sinusitis
**Answer key:** Migraine without aura (1)

**Question 2**
List key features from the history that support your diagnosis. (3 makrs)

☐ Unilateral throbbing pain
☐ Photophobia / phonophobia
☐ Nausea or vomiting
☐ Worsens on bending forward
**Answer key:** First three (1 each)

**Question 3**
Name two other primary headache disorders that may be considered in the differential diagnosis.

**Answer Key:** (any 2 × 0.5 mark = 1 mark)

- Tension-type headache
- Cluster headache
  **Marks:** 1

**Scenario 6:**  Imran, a 35-year-old office worker, presents to the emergency department with a sudden, severe headache that started abruptly during exercise. He describes it as “the worst headache of my life.” The pain began 30 minutes ago and has not improved. He reports mild neck stiffness but no vomiting or visual symptoms.

**Question 1**
What are your three leading diagnostic possibilities at this time?

**Answer Key:** (any 3 × 1 mark = 3 marks)

- Subarachnoid hemorrhage
- Meningitis
- Intracranial bleed or venous thrombosis
  **Marks:** 3

**Question 2**
Which features mandate urgent imaging?
☐ Thunderclap onset
☐ Neck stiffness
☐ New neurological deficit
☐ Relieved by sleep
**Answer key:** First three (1 each)

**Question 3**
What one immediate investigation would you order first in this patient, and what is its **purpose**?

**Answer Key:** Non-contrast CT brain (1) + To rule out bleed/SAH (1)

**Scenario 7:** A 58-year-old man has reduced urine for 36 h after 3 days of diarrhea. He’s been taking ibuprofen 400 mg TID for knee pain and enalapril for HTN. BP 98/62, dry mucosae, afebrile.

Q1. Classify the type of kidney injury.
☐ Prerenal
☐ Intrinsic renal
☐ Postrenal
**Answer key:** Prerenal (1)

**Q2. (Open ended – 2 marks)**
Mention **two findings** supporting your classification.
**Expected:** Volume loss (1) + Hypotension (1)

**Q3** Name **two** first investigations to order now. *(Max 8 words.)*

**Answer:**  Any two: Urea/creatinine & electrolytes (K⁺) (1), urinalysis (0.5), ECG (0.5), ABG if ill (0.5). Max 2.

Score : **2 marks**

**Scenario 8:** A 70-year-old man with months of poor stream, hesitancy, nocturia now has 24 h of minimal urine and suprapubic fullness. Afebrile, BP 150/90.

Q1. Identify the category of renal dysfunction.
☐ Prerenal
☐ Intrinsic renal
☐ Postrenal
**Answer key:** Postrenal (1)

**Q2** What is the single most important bedside action now and why? *(One sentence.)*

Bladder scan and urethral catheterization (2) to relieve retention, protect kidneys (0.5).

**Score: 2.5 marks**
**Q3.** Name first line investigations.

☐ Renal/bladder ultrasound
☐ Serum electrolytes & creatinine
☐ Urine culture
☐ Chest X-ray
**Answer key:** First two (1 each)

**Post Test (Phase 1)**

**Case 1:** A 30-year-old man presents with yellow discoloration of eyes and right upper-quadrant (RUQ) pain for one week. He also complains of itching, dark urine, and pale stool. There is no history of dental work or blood transfusion. On examination, his gallbladder is palpable but non-tender.

**Q1.** List your **two leading differential diagnoses.** (Open-ended)
**Scoring:** 1 mark each (Max = 2)

**Answer Key:**

- Obstructive jaundice (likely choledocholithiasis)
- Viral hepatitis
  **Score:** 2

**Q2.** Which of the following **historical or examination findings** are most consistent with the pattern described? (Select ≥3)
☐ Dark urine and pale stool
☐ Fever and rigors
☐ Generalized pruritus
☐ Tender hepatomegaly
☐ Palpable non-tender gallbladder
☐ Past blood transfusion
☐ Weight loss
**Scoring:** 1 mark per correct response (Max = 3)

**Answer Key:**

- Pale stool and dark urine
- Pruritus (itching)
- Palpable gallbladder with no tenderness
  **Score:** 3

**Q3**. Choose the **single best initial investigation** to confirm the suspected pathology.
☐ ALT and AST levels
☑ Ultrasound abdomen
☐ Liver biopsy
☐ MRCP
☐ Viral serology
**Scoring:** 1 mark

**Answer Key:**

- Ultrasound abdomen
  **Score:** 1

**Case 1: Yellow Eyes and RUQ Pain**

| **Question** | **No. of Responses** | **Should Write** | **Should Not Write** | **Score** | **Correct but No Score** |
| --- | --- | --- | --- | --- | --- |
| **1. Two leading differential diagnoses** | Two | Obstructive jaundice (e.g., choledocholithiasis); Viral hepatitis | Cirrhosis; Alcoholic hepatitis | 1 + 1 | “Hepatic jaundice” (without specification) |
| **2. Key findings consistent with diagnosis** | Three or more | Dark urine; Pale stool; Pruritus; Palpable non-tender gallbladder | Fever/chills; Tender liver | 1 each (max 3) | “Jaundice” repeated as symptom |
| **3. Best initial investigation** | One | Ultrasound abdomen | ERCP; Liver biopsy | 1 | “LFTs” acceptable but no score |

**Case 2:** A 25-year-old woman in her third trimester presents with jaundice, vomiting, and right-upper-quadrant pain. She lives in an area with poor sanitation and has no prior liver disease.

**Q1.** Identify the **most likely diagnosis.**
☑ Acute viral hepatitis (E)
☐ Acute fatty liver of pregnancy
☐ Intrahepatic cholestasis of pregnancy
☐ Drug-induced hepatitis
☐ Gallstones
**Scoring:** 1 mark
→ **Acute viral hepatitis E**

**Q2.** Which test will **confirm** your suspected diagnosis?
☑ Serum anti-HEV IgM antibody
☐ Serum bile acids
☐ ALT and AST
☐ Ultrasound abdomen
☐ Hepatitis B surface antigen
**Scoring:** 1 mark
→ **Serum anti-HEV IgM antibody**

**Q3.** What is the major risk specific to this patient group?
→ **Fulminant hepatic failure**

**Q4.** What is the **most important immediate management priority?** (Open-ended)
→ **Supportive care and monitoring for encephalopathy**

**Case 2: Jaundice in Pregnancy**

| **Question** | **No. of Responses** | **Should Write** | **Should Not Write** | **Score** | **Correct but No Score** |
| --- | --- | --- | --- | --- | --- |
| **1. Most likely cause** | One | Acute viral hepatitis E | Gallstones; Fatty liver of pregnancy | 1 | “Hepatitis” (unspecified) |
| **2. Confirmatory test** | One | Serum anti-HEV IgM antibody | HBsAg; LFTs; Ultrasound | 1 | “HEV PCR” acceptable but no score |
| **3. Major risk in this group** | One | Fulminant hepatic failure | Cholestasis; Preterm labor | 1 | “Maternal mortality” acceptable phrasing |
| **4. Immediate management priority** | One | Supportive care; Monitor for encephalopathy | Antivirals; Steroids | 1 | “Hospital admission” acceptable but no score |

**Case 3:** A 28-year-old woman presents with irregular menstrual cycles and occasional milky discharge from both breasts. She denies visual problems, headaches, or weight changes.

**Q 1**. What is the most likely diagnosis now?

**Answer Key:** *Hyperprolactinemia causing anovulation*
**Score:** 1

**Q 2**. From the following, select the **two most relevant findings** that support your diagnosis.
☐ Galactorrhea
☐ Hirsutism
☐ Weight gain
☐ Irregular or absent menses
☐ Visual field defect
**Scoring:** 1 mark each (Max = 2)

**Answer Key:**

- Galactorrhoea (milky breast discharge)
- Irregular or absent menses
  **Score:** 2 (1 mark each)

**Q 3**. Which **laboratory test** would confirm your suspected diagnosis?
☑ Serum prolactin level
☐ FSH and LH levels
☐ TSH
☐ MRI pituitary
☐ Progesterone level
**Scoring:** 1 mark

**Answer Key:** Serum prolactin level
**Score:** 1

**Case 3:** Irregular Menses and Galactorrhea

| **Question** | **No. of Responses** | **Should Write** | **Should Not Write** | **Score** | **Correct but No Score** |
| --- | --- | --- | --- | --- | --- |
| **1. Most probable diagnosis** | One | Hyperprolactinemia causing anovulation | PCOS; Hypothyroidism | 1 | “Pituitary adenoma” acceptable but incomplete |
| **2. Key features supporting diagnosis** | Two | Galactorrhea; Irregular/absent menses | Visual defect; Weight gain | 1 + 1 | “Amenorrhea” acceptable synonym |
| **3. Confirmatory investigation** | One | Serum prolactin level | MRI; FSH/LH | 1 | “Endocrine profile” acceptable but no score |

**Case 4:** The same woman is later found to have anovulation due to polycystic ovarian syndrome (PCOS). She asks for advice about management and future conception.

**Q 1**. State **three lifestyle measures** you would recommend improving her condition.

**Answer Key:**

- Weight reduction through diet and exercise
- Stress management and counseling
- Regular sleep and healthy diet
  **Score:** 3 (1 mark each)

**Q 2**. List two first-line medical treatments to induce ovulation.
☑ Clomiphene citrate / Letrozole
☑ Metformin
☐ Oral contraceptive pills
☐ Gonadotropin injections
☐ Bromocriptine
**Scoring:** 1 mark each (Max = 2)

**Answer Key:**

- Clomiphene citrate or Letrozole
- Metformin (if insulin resistance or obesity)
  **Score:** 2 (1 mark each)

**Q 3**. Mention one important counseling point for this patient.

**Answer Key:**

- Explain that with treatment and lifestyle changes, fertility outcomes are often favorable; reassure about prognosis.
  **Score:** 1

**Case 4: PCOS-Related Anovulation**

| **Question** | **No. of Responses** | **Should Write** | **Should Not Write** | **Score** | **Correct but No Score** |
| --- | --- | --- | --- | --- | --- |
| **1. Lifestyle modifications** | Three | Weight reduction; Exercise; Stress management; Adequate sleep; Balanced diet | Immediate fertility procedures | 1 each (max 3) | “Healthy habits” too vague |
| **2. First-line medical treatments** | Two | Clomiphene citrate or Letrozole; Metformin | IVF; OCP; Bromocriptine | 1 + 1 | “Ovulation drugs” (nonspecific) |
| **3. Counseling point** | One | Reassure that fertility outcomes are favorable with treatment | “Pregnancy guaranteed” | 1 | “Possible conception” acceptable phrasing |

**Case 5:** Maria, a 29-year-old accountant, reports recurrent left-sided headaches for three months. Each episode lasts five hours, with nausea and sensitivity to sound. She denies vomiting, blurring of vision, or early-morning worsening. Neurological exam and blood pressure are normal.

**Q 1.** What is the most probable diagnosis?

**Answer Key:** *Migraine without aura*
**Marks:** 1

**Q 2**. Identify **two features** that make a secondary cause of headache less likely.
☑ Normal neurological examination
☑ Absence of vomiting or early-morning worsening
☐ Visual blurring
☐ Raised blood pressure
☐ Sudden onset “worst headache”
**Scoring:** 1 mark each (Max = 2)

- No vomiting or early-morning worsening
- No visual disturbance
- Normal neurological exam
- Normal BP
  **Marks:** 2

**Q 3.**  Which **single baseline investigation** would be appropriate at this stage?
☑ Blood pressure measurement or fundoscopy
☐ CT scan
☐ MRI brain
☐ EEG
☐ ESR
**Scoring:** 1 mark

**Answer Key**

- *Blood pressure measurement* OR *Fundoscopy*
  **Marks:** 1

**Case 5: Recurrent Headache (Migraine without Aura)**

| **Question** | **No. of Responses** | **Should Write** | **Should Not Write** | **Score** | **Correct but No Score** |
| --- | --- | --- | --- | --- | --- |
| **1. Most probable diagnosis** | One | Migraine without aura | Secondary causes (tumor, raised ICP, infection, tension-type, cluster) | 1 | — |
| **2. Two findings making secondary cause unlikely** | Two | No vomiting or morning worsening; Normal BP and neuro exam | “Normal CT/MRI” (not mentioned in stem) | 1 + 1 | All acceptable negative findings |
| **3. One baseline investigation** | One | Blood pressure measurement / Fundoscopy | MRI/CT (not initially required) | 1 | “Routine bloods” acceptable but no score |

**Case 6:** Sara returns for follow-up. She has been taking ibuprofen daily to “prevent” headaches. Over the past month, her headaches have become more frequent, dull, and constant. She appears anxious but her examination remains normal.

**Q 1.**  What is the most likely explanation for her new headache pattern?

**Answer Key:**

- *Medication-overuse headache (rebound headache)*
  **Marks:** 1

**Q 2**. Select the **three most appropriate management steps** for her condition.

☑ Educate and gradually withdraw analgesics
☑ Consider preventive therapy (e.g., propranolol/topiramate)
☑ Encourage lifestyle regulation (sleep, stress, hydration)
☐ Prescribe stronger analgesics
☐ Order urgent neuroimaging
**Scoring:** 1 mark each (Max = 3)

**Answer Key:** (any 3 × 1 mark = 3 marks)

- Educate about and withdraw overused analgesic
- Start preventive therapy if indicated (e.g., propranolol, topiramate)
- Emphasize non-pharmacologic measures (stress, sleep, hydration)
- Continue headache diary and follow-up
  **Marks:** 3

**Q3.** Suggest **two non-pharmacological strategies** to prevent recurrence. (Open-ended)
**Scoring:** 0.5 mark each (Max = 1)

**Case 6: Worsening Headaches with Daily Analgesic Use**

| **Question** | **No. of Responses** | **Should Write** | **Should Not Write** | **Score** | **Correct but No Score** |
| --- | --- | --- | --- | --- | --- |
| **1. Most likely diagnosis** | One | Medication-overuse (rebound) headache | Chronic migraine | 1 | “Analgesic-related headache” acceptable |
| **2. Key management steps** | Three | Stop analgesic; Start preventive therapy; Regulate sleep/stress; Hydration | Add stronger analgesics; MRI immediately | 1 each (max 3) | “Gradual withdrawal” acceptable variation |
| **3. Non-pharmacologic prevention strategies** | Two | Stress management; Regular sleep/hydration; Trigger avoidance | “Start antibiotics” | 0.5 + 0.5 | “Lifestyle changes” acceptable but nonspecific |

**Case 7:** A 62-year-old woman with diabetes and hypertension underwent contrast-enhanced CT 48 hours ago. She is now oliguric and nauseated. BP = 105/66 mmHg, afebrile, on metformin and enalapril.

**Q1.** Identify the **most likely mechanism/category** of her renal injury and list **two risk factors.** (Open-ended, Max 12 words)
**Scoring:** 2 marks

**Answer:**

**Intrinsic AKI—ATN/contrast-associated** (1) + any two: **contrast 48 h**, **ACE-I**, **metformin**, **diabetes**, **borderline BP** (1.5).

**Q2** State **three priority actions** regarding fluids, medications, or monitoring. (Max 12 words)
**Scoring:** 3 marks

Answer:

Any three: isotonic IV hydration (1), hold ACE-I (0.5), hold metformin (0.5), avoid NSAIDs/contrast (0.5), monitor urine output (0.5), check K⁺ & creatinine trend (0.5). Max 3.

**Q3** Name one bedside test to detect a life-threatening complication. *(Max 5 words.)* **(**1 mark).

Answer

**ECG for hyperkalaemia** (1).

**Case 7: Oliguria after Contrast CT (AKI)**

| **Question** | **No. of Responses** | **Should Write** | **Should Not Write** | **Score** | **Correct but No Score** |
| --- | --- | --- | --- | --- | --- |
| **1. Mechanism and risk factors** | One (with two risk factors) | Intrinsic AKI (ATN/contrast-associated); Diabetes; ACE inhibitor; Contrast use | Prerenal; Postrenal causes | 2 | “Kidney injury” acceptable but incomplete |
| **2. Priority management actions** | Three | IV isotonic fluids; Stop ACE-I and metformin; Monitor urine output and K⁺ | NSAIDs; Diuretics | 1 each (max 3) | “Supportive care” too vague |
| **3. Bedside test for complication** | One | ECG for hyperkalaemia | ABG; Creatinine test | 1 | “Serum K⁺” acceptable but less specific |

**Case 8:** A 45-year-old man presents with fever 38.9°C, dysuria, right flank pain, and reduced urine output for 24 hours. BP = 100/60, RR = 24, looks ill.

**Q1** List **two clinical features** that mandate urgent management. (Open-ended)
**Scoring:** 1 mark each (Max = 2)

**Answer:**

Any two: fever/sepsis, hypotension, tachypnoea, oliguria.

**Q2** Describe **three immediate actions** you would initiate. (Open-ended)
**Scoring:** 1 mark each (Max = 3)

**Answer:** Any three: Sepsis bundle—IV antibiotics after cultures (1), IV fluids (1), labs incl. K⁺/creatinine, lactate (0.5), ECG for K⁺ (0.5), monitor urine output/catheter if retention (0.5). Max 3.

**Q3.** What **imaging study** would you request first, and **what will it help rule out?** (One sentence)
**Scoring:** 2 marks

**Answer:**

**Renal/bladder ultrasound** (1) **to rule out obstructive pyelonephritis/hydronephrosis needing drainage** (1).

**Case 8: Fever and Flank Pain (Sepsis/Obstructive Pyelonephritis)**

| **Question** | **No. of Responses** | **Should Write** | **Should Not Write** | **Score** | **Correct but No Score** |
| --- | --- | --- | --- | --- | --- |
| **1. Urgent features** | Two | Fever with sepsis; Hypotension; Oliguria; Tachypnea | Mild dysuria; Backache | 1 each (max 2) | “Looks ill” acceptable |
| **2. Immediate management steps** | Three | IV fluids; Broad-spectrum antibiotics after cultures; Monitor urine output | NSAIDs; Oral antibiotics only | 1 each (max 3) | “Hospital admission” acceptable |
| **3. Imaging and purpose** | One (two-part) | Renal/bladder ultrasound to rule out obstruction/hydronephrosis | CT immediately; X-ray | 2 | “Imaging for blockage” acceptable phrasing |

**Scoring Key:**

| **Case** | **Question Type** | **Max Marks** | **Assessment Focus** |
| --- | --- | --- | --- |
| 1 | Mixed (open + multi-select) | 6 | Differential diagnosis, reasoning |
| 2 | Closed + open | 4 | Etiology & risk reasoning |
| 3 | Mixed | 4 | Endocrine recognition |
| 4 | Mixed | 6 | Lifestyle & management planning |
| 5 | Mixed | 4 | Headache differentiation |
| 6 | Mixed | 5 | Medication-related reasoning |
| 7 | Open | 6 | AKI mechanism & management |
| 8 | Open | 7 | Sepsis & acute care |
| **Total** | — | **42 marks** | — |

**Pre-Test (Phase-2)**

**Scenario 1:**
A 45-year-old man presents with right-sided scrotal swelling for two months. The swelling is painless and not reducible.

**(a) *Open-ended***

List two possible causes of a *painless scrotal swelling* in this patient.
**Expected answers:** Testicular tumour / hydrocele / epididymal cyst / inguinal hernia (if reducible).

**(b) *Closed-ended (Single best answer)***

Which of the following features most strongly suggests a testicular tumour rather than other causes?

A. Sudden onset of pain and redness
B. Soft fluctuant swelling that transilluminates
C. Hard, irregular, non-transilluminating mass fixed to testis
D. Swelling increases on coughing and straining
E. Pain relieved by elevation of the scrotum
F. Swelling reduces when lying flat
G. Mild tenderness over epididymis

**Correct:** C — hard, irregular, non-transilluminating mass fixed to testis.

**(c) *Closed-ended (Multiple correct)***

Which of the following are common causes of scrotal swelling in adult males? *(Select all that apply.)*

A. Hydrocele B. Varicocele C. Epididymo-orchitis D. Testicular torsion E. Testicular tumour F. Inguinal hernia G. Spermatocele H. Fournier’s gangrene

**Correct:** A – G (all except H which causes diffuse scrotal gangrene, not discrete swelling).

**Scenario 2:**
Mr Kamran, 45 y, reports painless right testicular swelling with weight loss and back pain.

**(a) *Open-ended***

Name **two red-flag features** that suggest malignancy in a patient with scrotal or urinary complaints.
**Expected:** Painless hard mass, unexplained weight loss, back/bony pain, hematuria.

**(b) *Closed-ended (Single best answer)***

Which of the following symptoms is a red flag for metastatic spread of testicular cancer?

A. Painful urination
B. Scrotal redness and tenderness
C. Back pain and bone pain
D. Increased frequency of urination only
E. Nocturia without pain
F. Transient dysuria after exercise
G. Local itching

**Correct:** C — back/bone pain indicates retroperitoneal or vertebral metastases.

**(c) *Closed-ended (Multiple correct)***

Which findings warrant urgent urology referral? *(Select all that apply.)*

A. Painless hard testicular lump B. Palpable abdominal mass C. Hematuria D. Hydrocele E. Weight loss F. Night sweats G. Fever with dysuria

**Correct:** A, B, C, E, F.

**Scenario 3:**
A 32-year-old man presents with fever and severe headache for 5 days. He has photophobia and vomiting but no rash or ear discharge. He lives in a hostel.

**(a)** What key historical feature would make you suspect tuberculous meningitis rather than acute pyogenic meningitis?

**Expected answer:**
Gradual/subacute onset with low-grade fever, weight loss, and constitutional symptoms over several weeks.

**(b)** Which of the following is most characteristic of *tuberculous meningitis* rather than *acute bacterial meningitis*? *(Select the single best answer.)*

A. Sudden onset of severe headache with vomiting
B. Low-grade fever with night sweats for 2–3 weeks
C. Petechial rash and photophobia
D. Rapid deterioration over hours
E. No focal neurological signs
F. Associated ear discharge

**Correct answer:** **B** — low-grade fever with night sweats and chronic progression.

**(c)** Which of the following historical clues support tuberculous meningitis? *(Select all that apply.)*
A. Recent weight loss
B. Chronic cough
C. Gradual onset of symptoms
D. High-grade fever with chills
E. Exposure to TB contact
F. Rapid onset within hours

**Correct:** A, B, C, E

**Scenario 4:**
A hostel resident presents with fever, vomiting, and headache. His roommate says he was drowsy last night.

1. What is your next immediate step before proceeding to confirm the diagnosis?

**Expected answer:**
Assess level of consciousness and perform neuroimaging (CT/MRI) to rule out raised intracranial pressure before lumbar puncture.

b.What is the *most appropriate next step* in management? *(single best response)*

A. Perform lumbar puncture immediately
B. Start empirical antibiotics and corticosteroids
C. Obtain urgent CT/MRI brain before LP
D. Give oral paracetamol and observe
E. Discharge with follow-up advice
F. Wait for CSF culture report before any intervention

**Correct:** **C – Neuroimaging before LP**

c.Which of the following are red-flag symptoms suggesting raised intracranial pressure or complications in meningitis? *(Select all that apply.)*

A. Sudden confusion or drowsiness
B. Repeated vomiting
C. Focal weakness
D. Blurred vision
E. Fever < 38 °C only
F. Neck stiffness

**Correct:** A, B, C, D, F

**Scenario 5:**
A 40-year-old teacher presents with right-upper-quadrant pain for 4 days. The pain is dull, worse after fatty meals, and sometimes radiates to the right shoulder. She reports mild fever and nausea.

**(a)** List two most likely differential diagnoses based on this presentation.

**Expected answers:**

- Acute cholecystitis
- Acute viral hepatitis
  *(Accept: biliary colic, hepatic abscess, or pancreatitis as additional plausible options.)*

**(b)** Which single finding most strongly supports acute cholecystitis?

A. Sudden severe pain radiating to left shoulder
B. Pain aggravated after fatty meals with low-grade fever
C. Watery diarrhea and epigastric burning
D. Dark urine and pale stools for > 7 days
E. Generalized pruritus with jaundice
F. Persistent low-grade fever for > 3 weeks
G. Sharp colicky pain relieved by vomiting

**Correct:** B — post-prandial RUQ pain with fever.

**(c)** Which of the following conditions commonly cause right-upper-quadrant pain? *(Select all that apply.)*

A. Acute cholecystitis  B. Acute viral hepatitis  C. Liver abscess  D. Peptic ulcer disease
E. Acute pancreatitis  F. Pneumonia (right lower lobe)  G. Appendicitis

**Correct:** A, B, C, F

**Scenario 6:**
A patient with acute hepatitis develops confusion and abdominal distension.

**(a)** What life-threatening complication must be suspected in this situation?

**Expected answer:** Hepatic encephalopathy / acute liver failure.

**(b)** Which of the following requires urgent hospital admission?

A. Mild jaundice with good appetite
B. Persistent vomiting only
C. Confusion with flapping tremor
D. Low-grade fever and mild RUQ tenderness
E. Dark urine without abdominal pain
F. Fatigue after viral infection
G. Anorexia and malaise for a week

**Correct:** C — hepatic encephalopathy.

**(c)** Which are recognized red-flag signs in liver or biliary disease? *(Select all that apply.)*

A. Altered sensorium B. GI bleeding C. Progressive abdominal distension D. Mild nausea only
E. Jaundice with pruritus F. Severe weight loss G. Fever > 102 °F

**Correct:** A, B, C, E, F, G

**Scenario 7:**

A 58-year-old man has reduced urine for 36 h after 3 days of diarrhea. He’s been taking ibuprofen 400 mg TID for knee pain and enalapril for HTN. BP 98/62, dry mucosae, afebrile.

**Q1 (Diagnosis; 2 marks).** What category of AKI is most likely? Give two key historical/clinical features that support it. *(Max 12 words total.)*
**Q2 (Immediate management; 3 marks).** State three immediate actions in ED. *(Max 12 words total.)*
**Q3 (Tests; 2 marks).** Name two first investigations to order now. *(Max 8 words.)*

**Examiner key (A1)**

- Q1 (2): Prerenal AKI (± drug-related) (1) + any two: volume depletion (diarrhea/poor intake), hypotension 98/62, NSAID/ACE-I use (1).
- Q2 (3): Any three: stop NSAID/ACE-I (1), isotonic IV fluids, assess response (1), monitor urine output/catheter if needed (0.5), avoid contrast (0.5), early ECG if K⁺risk (0.5). Max 3.
- Q3 (2): Any two: Urea/creatinine & electrolytes (K⁺) (1), urinalysis (0.5), ECG (0.5), ABG if ill (0.5). Max 2.

**Scenario 8:** A 70-year-old man with months of poor stream, hesitancy, nocturia now has 24 h of minimal urine and suprapubic fullness. Afebrile, BP 150/90.

**Q1 (Diagnosis; 2 marks).** What category of AKI is most likely? Give two supporting history/bedside clues. *(Max 12 words.)*
**Q2 (Immediate step; 2.5 marks).** What is the single most important bedside action now and why? *(One sentence.)*
**Q3 (Imaging & labs; 2.5 marks).** Name one first-line imaging test and one lab to prioritize. *(Max 8 words.)*

**Examiner key (A2)**

- Q1 (2): **Postrenal AKI** (1) + any two: LUTS, acute retention/oliguria, palpable bladder (1).
- Q2 (2.5): Bladder scan and urethral catheterization (2) to relieve retention, protect kidneys (0.5).
- Q3 (2.5): Renal/bladder ultrasound (KUB) (1.5) + electrolytes/K⁺ or creatinine (1).

**Post-Test (Phase-2)**

**Scenario 1:**
A 45-year-old man has painless right-sided scrotal swelling, weak urine stream, and weight loss.

**(a) *Open-ended***

List **three essential investigations** to confirm the diagnosis and assess disease extent.
**Expected:** Ultrasound scrotum, serum tumour markers (AFP, β-hCG, LDH), CT abdomen/pelvis ± chest X-ray.

**(b) *Closed-ended (Single best answer)***

Which investigation is most specific for the diagnosis of testicular tumour subtype?

A. Urine analysis B. Ultrasound scrotum C. Serum AFP and β-hCG D. PSA level E. CT pelvis F. FNAC of testis G. Abdominal X-ray

**Correct:** C — serum AFP/β-hCG are tumour-specific markers.

**(c) *Closed-ended (Multiple correct)***

Which tests help evaluate both primary and secondary lesions in suspected testicular cancer? *(Select all that apply.)*

A. Scrotal USG B. Serum tumour markers C. Chest X-ray D. CT abdomen/pelvis E. Bone scan F. TRUS prostate G. Urine culture

**Correct:** A, B, C, D, E.

**Scenario 2:**
Mr Kamran asks, “Doctor, could this be cancer? What will happen next?”

**(a) *Open-ended***

How would you explain the next steps in management to this patient using empathetic communication?
**Expected:** Acknowledge concern → explain need for imaging and blood tests → reassure that most testicular cancers are curable → emphasize early treatment improves outcome.

**(b) *Closed-ended (Single best answer)***

Which of the following statements best demonstrates effective communication in this scenario?

A. “Yes, it’s definitely cancer; we’ll remove it tomorrow.”
B. “We can’t say yet; further tests will help us confirm the cause and plan treatment together.”
C. “Don’t worry; it’s probably nothing serious.”
D. “I’ll refer you to oncology; no need for details now.”
E. “Please talk to the nurse; I’m busy.”
F. “It’s just infection; ignore online information.”
G. “You should have come earlier; now it’s too late.”

**Correct:** B

**(c) *Closed-ended (Multiple correct)***

Key components of counselling and follow-up for suspected testicular cancer include: *(Select all that apply.)*

A. Explain nature of disease and cure rates
B. Maintain patient confidentiality
C. Discuss fertility preservation before surgery
D. Avoid mentioning prognosis to prevent anxiety
E. Encourage psychological support
F. Involve family (with patient consent)
G. Schedule follow-up for biopsy results

**Correct:** A, B, C, E, F, G

**Scenario 3:**

A 28-year-old man with fever, severe headache, and neck stiffness is suspected of *acute pyogenic meningitis*.

1. List three key investigations you would order before starting definitive treatment.

**Answers:**

1. CBC and blood cultures
2. CSF analysis (cell count, glucose, protein, Gram stain, culture)
3. CT/MRI brain before LP if focal deficits or altered consciousness present

b.Which investigation should be performed first in a patient with headache, fever, and focal neurological signs?

A. Lumbar puncture
B. MRI brain
C. CT scan brain
D. CSF culture
E. CBC and ESR
F. Chest X-ray

**Correct:** **C – CT scan brain**

c.Which of the following are appropriate initial management steps in acute bacterial meningitis? *(Select all that apply.)*

A. Empiric IV antibiotics (e.g., ceftriaxone + vancomycin)
B. IV fluids and antipyretics
C. Wait for CSF culture before starting antibiotics
D. Dexamethasone if indicated
E. Notify public health authorities (if meningococcal suspected)
F. Perform LP before assessing consciousness

**Correct:** A, B, D, E

**Scenario 4:**
While taking history, Mr. Rizwan Ali asks, “Doctor, is this something serious?”

1. Write one empathetic yet informative statement you would say to address his concern.

**Answer:**

“Your symptoms suggest an infection around the brain coverings. It can be serious, but we’ll do tests quickly and start treatment to help you recover.”

**b.** Which of the following responses best demonstrates *effective, professional communication*?

A. “Yes, it’s quite serious; you should be worried.”
B. “You have meningitis, we’ll admit you for tests and treatment.”
C. “Don’t worry, it’s probably nothing important.”
D. “It may be an infection around the brain; we’ll confirm and treat promptly.”
E. “You should go home and rest.”
F. “I can’t say anything until I get all your reports.”

**Correct:** **D**

c.Which components are essential when communicating with a patient in such cases? *(Select all that apply.)*

A. Empathy and reassurance
B. Use of simple, non-technical language
C. Honesty about seriousness and management plan
D. Avoiding emotional connection to maintain objectivity
E. Checking patient understanding
F. Encouraging questions

**Correct:** A, B, C, E, F

**Scenario 5:**
Mrs Sadia Khan, 40 years old, presents with RUQ pain, jaundice, and fever. On examination, tenderness is noted below the right costal margin.

**(a)** List three key investigations to confirm the diagnosis and assess severity.

**Expected:** CBC + LFTs + Ultrasound abdomen (+ viral hepatitis panel / blood culture if indicated).

**(b)** Which investigation should be ordered first to confirm gallbladder pathology?

A. Abdominal X-ray B. Ultrasound abdomen C. CT scan D. ERCP E. HIDA scan F. MRI abdomen G. Blood culture

**Correct:** B — Ultrasound abdomen.

**(c)** Which of the following are appropriate initial management steps for suspected acute cholecystitis? *(Select all that apply.)*

A. Nil per mouth (NPO) B. IV fluids C. Empirical IV antibiotics D. Immediate laparotomy
E. Analgesia/antipyretics F. Monitor vitals & urine output G. Discharge on oral analgesics only

**Correct:** A, B, C, E, F

**Scenario 6:**
After hearing the diagnosis of gallstones, the patient asks, *“Doctor, will I need an operation?”*

**(a)** Write a brief, empathetic response explaining the possible next steps.

**Expected answer:** > “Gallstones sometimes need surgery if they cause repeated pain or infection. We’ll confirm with tests and then decide together.”

**(b)** Which of the following statements best demonstrates effective communication?

A. “You’ll definitely need surgery.”
B. “It’s not serious; ignore it for now.”
C. “It could be gallstones; tests will confirm, and we’ll discuss safe treatment options.”
D. “I can’t comment until reports arrive.”
E. “You should prepare for emergency surgery today.”
F. “Just avoid fatty food; no need for tests.”
G. “I’ll let the nurse explain later.”

**Correct:** C

**(c)** Key elements of effective patient counselling include: *(Select all that apply.)*

A. Empathy and reassurance B. Using non-technical language C. Providing honest information
D. Avoiding all negative details E. Checking patient understanding F. Encouraging questions G. Avoiding eye contact to remain professional

**Correct:** A, B, C, E, F

**Scenario 7:** A 62-year-old woman with DM on metformin and HTN on enalapril had a contrast-enhanced CT 48 h ago. Now oliguria and nausea. BP 105/66. No fever.

**Q1 (Mechanism & risks; 2.5 marks).** Most likely mechanism/category of AKI? List two risk factors present. *(Max 12 words.)*
**Q2 (Immediate management; 3 marks).** State three priority actions regarding fluids/medications/monitoring. *(Max 12 words.)*
**Q3 (Safety test; 1.5 marks).** Name one bedside test to detect a life-threatening complication. *(Max 5 words.)*

**Examiner key (B1)**

- Q1 (2.5): Intrinsic AKI—ATN/contrast-associated (1) + any two: contrast 48 h, ACE-I, metformin, diabetes, borderline BP (1.5).
- Q2 (3): Any three: isotonic IV hydration (1), hold ACE-I (0.5), hold metformin (0.5), avoid NSAIDs/contrast (0.5), monitor urine output (0.5), check K⁺ & creatinine trend (0.5). Max 3.
- Q3 (1.5): ECG for hyperkalaemia (1.5).

**Scenario 8:** A 45-year-old man has fever 38.9°C, dysuria, right flank pain and oliguria for 24 h. He looks ill; RR 24; BP 100/60.

**Q1 (Red flags; 2 marks).** List two features that mandate urgent treatment. *(Max 8 words.)*
**Q2 (Immediate management; 3 marks).** State three time-critical actions you will start now. *(Max 12 words.)*
**Q3 (Imaging decision; 2 marks).** What imaging will you request first, and what are you ruling out? *(One sentence.)*

**Examiner key (B2)**

- Q1 (2): Any two: fever/sepsis, hypotension, tachypnoea, oliguria.
- Q2 (3): Any three: Sepsis bundle—IV antibiotics after cultures (1), IV fluids (1), labs incl. K⁺/creatinine, lactate (0.5), ECG for K⁺ (0.5), monitor urine output/catheter if retention (0.5). Max 3.
- Q3 (2): Renal/bladder ultrasound (1) to rule out obstructive pyelonephritis/hydronephrosis needing drainage (1).
