# Supplementary material
Source: Research Square preprint supplement (doi:10.21203/rs.3.rs-9110539/v1)
Supplement: Supplementary file 5 [file 910a33c5e7a699e388687083.docx]

| ****AI vs Human OSCE Comparative Satisfaction and Acceptance Survey**** **Scale:** 1 = Strongly Disagree 2 = Disagree 3 = Neutral 4 = Agree 5 = Strongly Agree | | | | | | |
| --- | --- | --- | --- | --- | --- | --- |
| **Section A: Satisfaction & Organization** | | | | | | |
| **#** | **Statement** | **1** | **2** | **3** | **4** | **5** |
| 1 | The OSCE experience was engaging and well-organized. |  |  |  |  |  |
| 2 | The duration and timing at each station were appropriate. |  |  |  |  |  |
| 3 | The instructions and case scenarios were clear and realistic. |  |  |  |  |  |
| 4 | The assessment rubric and feedback criteria were transparent. |  |  |  |  |  |
| 5 | The OSCE environment (technical or physical) was comfortable and non-threatening. |  |  |  |  |  |
| **Section B: Learning Confidence & Self-Efficacy** | | | | | | |
| 6 | I felt confident while interacting with the patient (AI/Human). |  |  |  |  |  |
| 7 | I could demonstrate appropriate communication and reasoning skills. |  |  |  |  |  |
| 8 | I can apply what I learned in this OSCE to real clinical situations. |  |  |  |  |  |
| 9 | I could identify my learning gaps through examiner or AI feedback. |  |  |  |  |  |
| 10 | I felt motivated to further improve my clinical competence after this OSCE. |  |  |  |  |  |
| **Section C: Perceived Usefulness & Learning Value** | | | | | | |
| 11 | The AI-based OSCE improved my diagnostic reasoning skills. |  |  |  |  |  |
| 12 | The AI-based OSCE promoted reflective thinking and self-assessment. |  |  |  |  |  |
| 13 | The Human-based OSCE provided richer emotional and interpersonal engagement. |  |  |  |  |  |
| 14 | The AI and Human formats complemented each other effectively. |  |  |  |  |  |
| 15 | The OSCE contributed to my preparedness for real-world clinical decision-making. |  |  |  |  |  |
| **Section D: Realism, Usability & Technical Experience** | | | | | | |
| 16 | The AI-standardized patient was realistic and clinically accurate. |  |  |  |  |  |
| 17 | The AI interface was easy to use and free from major technical issues. |  |  |  |  |  |
| 18 | The AI responses were contextually appropriate and coherent. |  |  |  |  |  |
| 19 | The AI platform allowed sufficient opportunity for interaction and questioning. |  |  |  |  |  |
| 20 | The overall realism of the AI encounter matched that of a Human SP encounter. |  |  |  |  |  |
| **Section E: Fairness, Feedback & Ethics** | | | | | | |
| 21 | I was satisfied with the quality of feedback received (AI/Human). |  |  |  |  |  |
| 22 | I would recommend including AI-standardized patients in future OSCEs. |  |  |  |  |  |
| 23 | I am confident that AI-based assessments can be used ethically and fairly. |  |  |  |  |  |
| 24 | I prefer a hybrid approach (AI + Human SP) for future assessments. |  |  |  |  |  |
| 25 | Overall, this OSCE was a valuable learning and assessment experience. |  |  |  |  |  |

**Open-Ended Items**

1. What aspects of the AI-based OSCE did you find most valuable for your learning?
2. What aspects of the **Human-based OSCE** were most helpful for your learning?
3. What challenges or limitations did you experience with either format?
4. How could we enhance the realism, fairness, and feedback in future OSCEs?
5. Which format (AI or Human) do you believe better assesses your communication skills and clinical reasoning skills, and why?
