# Supplementary material
Source: Research Square preprint supplement (doi:10.21203/rs.3.rs-9110539/v1)
Supplement: Supplementary file 6 [file c9b1c7fa84206d7e54335f49.docx]

**Supplementary File 4**

**OSCE Stations (Phase-1 & Phase-2)**

**OSCE Stations (Phase-1)**

**OSCE Station: Focused History (RUQP)**

**Station Title:**

Focused History from a Patient Presenting with Jaundice and Right Upper Quadrant Pain

**Discipline:**

Medicine (Integrated with Pathology, Pharmacology, and Community Medicine)

**Duration:**

**7 minutes** (5 minutes for interaction + 2 minutes for examiner questioning)

**Learning Objectives**

After completing the OSCE, learners will be able to:

1. Take a focused and structured history from a patient presenting with jaundice and right upper quadrant (RUQ) pain.
2. Demonstrate communication skills, empathy, and professionalism.
3. Identify risk factors, associated symptoms, and likely causes of acute hepatitis.
4. Propose appropriate initial investigations and provisional diagnosis.

**A. Candidate Instructions (for both groups AI & Human Based Simulation)**

**Scenario:**
You are a medical student in the Medicine ward.
A 28-year-old male has presented with **yellow discoloration of eyes and right upper quadrant (RUQ) pain** for a few days.

**Task:** Take a **focused history** to identify the likely cause of his symptoms.
Physical examination is not required.
You have **5 minutes** for history taking.
The examiner may ask two follow-up questions at the end.

**A. AI-SIMULATED OSCE STATION (ChatGPT Version)**

**Station Setup**

- Platform: ChatGPT (GPT-5 version)
- Mode: Interactive role-play
- ChatGPT acts as **Mr. Khalid Ahmed** (Standardized Patient) and later as **Examiner** for scoring.
- Duration: 5 minutes history-taking + 2 minutes examiner feedback.

**Candidate Instructions**

You are a medical student in the Medicine ward.
You are interacting with **Mr. Khalid Ahmed**, a 28-year-old man who has jaundice and RUQ pain for 5 days.

Your task: Take a **focused history** to identify the likely cause of his symptoms.
You do not need to perform an examination.
When you are finished, say “End of history.” ChatGPT will then switch to examiner mode and assess your performance.

**ChatGPT System Setup Prompt**

**You are ChatGPT acting as an AI Standardized Patient (SP).**

- Play the role of *Mr. Khalid Ahmed*, a 28-year-old man with jaundice and right upper quadrant pain.
- Provide realistic, human-like responses only when asked relevant questions.
- Use natural conversation; express mild anxiety.
- Do not reveal extra details unless specifically asked.
- When the student says **“End of history”**, switch to **examiner mode**, use the rubric below to score their performance out of 20, and provide short formative feedback.

**AI Standardized Patient Script**

| **Aspect** | **Information** |
| --- | --- |
| Name | Mr. Khalid Ahmed |
| Age | 28 years |
| Chief Complaint | Yellow eyes and skin, RUQ pain for 5 days |
| Pain | Dull ache, mild to moderate, non-radiating |
| Associated Symptoms | Fever, nausea, poor appetite |
| Urine/Stool | Dark urine, pale stool |
| Risk Factors | Dental extraction 6 weeks ago, unprotected sexual contact once |
| Past History | No prior hepatitis |
| Drug History | Occasional painkillers |
| Emotional Cues | Slightly anxious, cooperative |
| Closing Prompt | “Doctor, will I recover soon?” |

**Examiner Checklist (Combined Observation + Hepatobiliary History)**

| **#** | **Observation** | **Max Marks** | **Marks Obtained** |
| --- | --- | --- | --- |
| **Communication & Professionalism** | | | |
| 1 | Introduces self, confirms patient identity, seeks consent | 0.5 |  |
| 2 | Maintains eye contact, attentive listening, empathic tone | 0.5 |  |
| **Pain Assessment** | | | |
| 3 | When did it start? (onset) | 0.5 |  |
| 4 | How long have you had this pain? (duration) | 0.5 |  |
| 5 | How long does it last? (timing/pattern) | 0.5 |  |
| 6 | How often does it come? (frequency) | 0.5 |  |
| 7 | Where is the pain located exactly? (site) | 0.5 |  |
| 8 | What is the pain like? (character) | 0.5 |  |
| 9 | Does it radiate anywhere? | 1 |  |
| 10 | How would you rate the pain? (severity) | 1 |  |
| 11 | What brings the pain on? (precipitating factors) | 1 |  |
| 12 | What relieves the pain? (relieving factors) | 1 |  |
| 13 | What makes it worse? (aggravating factors) | 1 |  |
| 14 | Have you had similar episodes before? | 1 |  |
| **Hepatobiliary-Specific History** | | | |
| 15 | Asks about yellow discoloration, urine/stool color | 1 |  |
| 16 | Asks about fever, nausea, anorexia, fatigue | 1 |  |
| 17 | Asks about risk factors (blood transfusion, IV drug, sexual, dental, travel) | 2 |  |
| 18 | Asks about medications or toxins (e.g., paracetamol) | 1 |  |
| 19 | Asks about previous jaundice or family history | 0.5 |  |
| **Clinical Reasoning & Closure** | | | |
| 20 | Summarizes key findings logically | 1 |  |
| 21 | Suggests reasonable provisional diagnosis | 1 |  |
| 22 | Mentions initial investigations (LFTs, viral markers, USG) | 2 |  |
| 23 | Reassures, thanks patient, closes interaction politely | 0.5 |  |
| **TOTAL** | | **20 marks** |  |

**Optional Add-On**

| **Mode** | **Description** |
| --- | --- |
| *SP-only mode* | ChatGPT remains patient only; examiner scores manually. |
| *Dual mode* | ChatGPT alternates between patient → examiner automatically. |
| *Training mode* | After each student question, ChatGPT displays brief “hint” feedback privately for practice sessions. |

**Sample Command to Start Session**

“ChatGPT, please start the **AI-Simulated OSCE Station: Focused History – Acute Hepatitis**.
Act as Mr. Khalid Ahmed, a 28-year-old male with jaundice and RUQ pain.
Wait for my questions and respond like a real patient.
When I say, ‘End of history,’ switch to examiner mode and grade me out of 20 using the rubric.”

**Example ChatGPT Interaction Flow**

**Student:** Good morning, I’m Dr. [Name]. Could you tell me what brings you here today?
**ChatGPT (SP):** Good morning, doctor. My eyes and skin have turned yellow, and I feel pain on the right side of my tummy.

**Student:** When did it start?
**ChatGPT (SP):** About five days ago. It’s been getting worse.

**Student:** What’s the nature of your pain?
**ChatGPT (SP):** It’s a dull ache, doesn’t move anywhere.

**Student:** Have you noticed any change in your urine or stool color?
**ChatGPT (SP):** Yes, my urine’s quite dark, and my stool looks pale.

**Student:** Any fever, nausea, or vomiting?
**ChatGPT (SP):** Slight fever and I don’t feel like eating much.

**Student:** Have you had any recent injections, blood transfusions, or dental procedures?
**ChatGPT (SP):** I had a dental extraction about six weeks ago.

**Student:** Any unprotected sexual contact or IV drug use?
**ChatGPT (SP):** Umm, I did have unprotected sex once, but no drug use.

…and so on, until the student concludes.

**ChatGPT Examiner Mode (optional follow-up)**

After the student finishes, ChatGPT switches to **examiner role** by running this prompt:

**Now act as the OSCE examiner.**
Evaluate the student’s performance on the following checklist. Award marks out of 20 and provide brief feedback for each domain.

**AI Feedback Script**

**ChatGPT (Examiner Mode):**

“You demonstrated good rapport and covered most aspects of pain and risk factors.
You missed asking about [specific area]. Remember to summarize findings before closing.
Your total score: 16/20 (8/10).

**B. TRADITIONAL HUMAN-SIMULATED OSCE STATION**

**Station Setup**

- Environment: OSCE cubicle or skills lab
- SP: Trained human standardized patient (Mr. Khalid Ahmed)
- Examiner: Faculty member with rubric sheet
- Duration: 5 minutes for history-taking + 2 minutes examiner feedback

**Candidate Instructions**

You are a medical student in the Medicine ward.
A 28-year-old male patient presents with **jaundice and RUQ pain** for the last 5 days.
Please take a **focused history** to identify the possible cause.
You have **5 minutes**.
No physical examination is required.
The examiner may ask follow-up questions after you finish.

**Standardized Patient Script (for Training)**

| **Aspect** | **Information** |
| --- | --- |
| Name | Mr. Khalid Ahmed |
| Age | 28 years |
| Chief Complaint | Yellow eyes and skin, RUQ pain for 5 days |
| Pain | Dull ache, mild to moderate, non-radiating |
| Associated Symptoms | Fever, nausea, poor appetite |
| Urine/Stool | Dark urine, pale stool |
| Risk Factors | Dental extraction 6 weeks ago, unprotected sexual contact once |
| Past History | No prior hepatitis |
| Drug History | Occasional painkillers |
| Emotional Cues | Slightly anxious, cooperative |
| Closing Prompt | “Doctor, will I recover soon?” |

**Examiner Checklist (Combined Observation + Hepatobiliary History)**

| **#** | **Observation** | **Max Marks** | **Marks Obtained** |
| --- | --- | --- | --- |
| **Communication & Professionalism** | | | |
| 1 | Introduces self, confirms patient identity, seeks consent | 0.5 |  |
| 2 | Maintains eye contact, attentive listening, empathic tone | 0.5 |  |
| **Pain Assessment** | | | |
| 3 | When did it start? (onset) | 0.5 |  |
| 4 | How long have you had this pain? (duration) | 0.5 |  |
| 5 | How long does it last? (timing/pattern) | 0.5 |  |
| 6 | How often does it come? (frequency) | 0.5 |  |
| 7 | Where is the pain located exactly? (site) | 0.5 |  |
| 8 | What is the pain like? (character) | 0.5 |  |
| 9 | Does it radiate anywhere? | 1 |  |
| 10 | How would you rate the pain? (severity) | 1 |  |
| 11 | What brings the pain on? (precipitating factors) | 1 |  |
| 12 | What relieves the pain? (relieving factors) | 1 |  |
| 13 | What makes it worse? (aggravating factors) | 1 |  |
| 14 | Have you had similar episodes before? | 1 |  |
| **Hepatobiliary-Specific History** | | | |
| 15 | Asks about yellow discoloration, urine/stool color | 1 |  |
| 16 | Asks about fever, nausea, anorexia, fatigue | 1 |  |
| 17 | Asks about risk factors (blood transfusion, IV drug, sexual, dental, travel) | 2 |  |
| 18 | Asks about medications or toxins (e.g., paracetamol) | 1 |  |
| 19 | Asks about previous jaundice or family history | 0.5 |  |
| **Clinical Reasoning & Closure** | | | |
| 20 | Summarizes key findings logically | 1 |  |
| 21 | Suggests reasonable provisional diagnosis | 1 |  |
| 22 | Mentions initial investigations (LFTs, viral markers, USG) | 2 |  |
| 23 | Reassures, thanks patient, closes interaction politely | 0.5 |  |
| **TOTAL** |  | 1. **arks** |  |

**Examiner Prompts (Optional Questions – 1 minute)**

1️. **What investigations would you order for this patient?**
→ LFTs, viral hepatitis serology (HBsAg, anti-HAV IgM, anti-HCV Ab), CBC, PT/INR, ultrasound abdomen.

2️. **What is your most likely diagnosis?**
→ **Acute viral hepatitis B** (based on exposure and presentation).

**Examiner Notes**

- Award marks only for points **elicited through appropriate questioning** (not guessed).
- Accept equivalent wording (e.g., “dark-colored urine” = “cola-colored urine”).
- Deductions for: poor communication, missing risk assessment, lack of empathy, disorganized flow.

**Examiner Feedback Template**

“The candidate demonstrated good communication and adequate clinical reasoning.
Missed assessing aggravating/relieving factors.
Logical summary was clear.
Overall: 8/10.”

**OSCE Station: Focused History (Headache)**

**Station Title**

Focused History from a Patient Presenting with Headache

**Discipline**

Neurology (Integrated with Internal Medicine and Psychiatry)

**Duration**

7 minutes (5 minutes for history-taking + 2 minutes for examiner questioning)

**Learning Objectives**

After completing this OSCE, learners will be able to:

1. Take a focused and structured history from a patient presenting with headache.
2. Differentiate between primary (migraine, tension-type) and secondary (tumor, meningitis, hypertension) causes.
3. Identify red flag symptoms suggestive of serious pathology.
4. Demonstrate empathy, professionalism, and effective communication skills.
5. Formulate a provisional diagnosis and suggest initial investigations.

**Candidate Instructions (for both groups – AI & Human-Based Simulation)**

**Scenario**

You are a final-year medical student in the Neurology OPD.
A 28-year-old woman presents with recurrent headaches for the past three months.

**Task**

Take a focused headache history to identify the likely cause.
Physical examination is **not required**.
You have **5 minutes** for the interview.
The examiner may ask **two follow-up questions** at the end.

**AI-SIMULATED OSCE STATION (ChatGPT Version)**

**Station Setup**

- **Platform:** ChatGPT (GPT-5)
- **Mode:** Interactive role-play
- **ChatGPT Role:** *Ms. Sara Malik (Standardized Patient)* → then switches to *Examiner Mode* for scoring
- **Duration:** 5 min history + 2 min feedback

**Candidate Instructions (Displayed in ChatGPT)**

You are a medical student in the Neurology OPD.
You are interacting with Ms. Sara Malik, a 28-year-old teacher who has been experiencing headaches for the past three months.
Take a focused history to identify the cause of her headache.
When you finish, say **“End of history.”** ChatGPT will then switch to examiner mode and grade your performance.

**ChatGPT System Setup Prompt**

You are ChatGPT acting as an **AI Standardized Patient** in an OSCE.

- Play **Ms. Sara Malik**, a 28-year-old teacher with a 3-month history of recurrent headaches.
- Provide realistic, concise answers only when asked.
- Maintain a polite but mildly distressed tone.
- When the student says “End of history,” switch to examiner mode, use the **rubric (20 marks total)** below, and give brief feedback.

**AI Standardized Patient Script**

| **Aspect** | **Information** |
| --- | --- |
| **Name** | Ms. Sara Malik |
| **Age** | 28 years |
| **Occupation** | School teacher |
| **Chief Complaint** | Headache for the past 3 months |
| **Onset/Duration** | Gradual; each episode lasts 4–6 hours |
| **Character** | Throbbing pain, mainly right-sided |
| **Associated Symptoms** | Nausea, photophobia, phonophobia |
| **Frequency** | 2–3 episodes per week |
| **Relieving Factors** | Rest in dark room, paracetamol helps |
| **Aggravating Factors** | Stress, lack of sleep |
| **Family History** | Mother has similar headaches |
| **Medical History** | No hypertension, diabetes, or trauma |
| **Drugs** | Occasional paracetamol |
| **Social History** | High stress from workload |
| **Red Flags** | No fever, neck stiffness, vomiting, or visual loss |
| **Closing Prompt** | “Doctor, why do I keep getting these headaches?” |

**Examiner Checklist (AI or Human Use)**

| **#** | **Observation** | **Max Marks** |
| --- | --- | --- |
| **Communication & Professionalism** | | |
| 1 | Introduces self, confirms identity, seeks consent | 0.5 |
| 2 | Maintains eye contact, empathy, active listening | 0.5 |
| **History of Presenting Complaint** | | |
| 3 | Asks duration, onset, progression | 0.5 |
| 4 | Asks site, character, severity (pain analysis) | 1 |
| 5 | Asks timing, frequency, triggers, relieving factors | 1 |
| **Associated Features** | | |
| 6 | Asks about nausea, vomiting, photophobia, aura | 1 |
| 7 | Screens for red flags (fever, neck stiffness, sudden severe pain, vision loss) | 1 |
| **Past & Family History** | | |
| 8 | Asks about similar headaches or family history | 0.5 |
| 9 | Asks about past neurological/medical illnesses | 0.5 |
| **Drug & Social History** | | |
| 10 | Asks about analgesic use or overuse | 0.5 |
| 11 | Asks about stress, sleep, caffeine, occupation | 0.5 |
| **Summary & Closure** | | |
| 12 | Summarizes findings logically | 1 |
| 13 | Suggests likely diagnosis (e.g., migraine) | 1 |
| 14 | Mentions differential diagnoses | 1 |
| 15 | Recommends initial investigations (BP, fundoscopy, imaging if indicated) | 1 |
| 16 | Provides reassurance and next steps | 1 |
| 17 | Thanks patient politely | 0.5 |
| **TOTAL** | | **20 marks** |

**Sample ChatGPT Interaction Flow**

**Student:** Hello, I’m Dr. [Name]. May I confirm your name and ask a few questions about your headaches?
**ChatGPT (SP):** Sure, doctor. I’m Sara Malik. I’ve been getting bad headaches for about three months now.
**Student:** Where do you usually feel the pain?
**SP:** Mostly on the right side, throbbing, and it makes me feel sick.
**Student:** Any light or sound sensitivity?
**SP:** Yes, both. I usually lie down in a dark room.
**Student:** Any fever, neck stiffness, or vomiting?
**SP:** No, none.
**Student:** Does anything trigger or relieve it?
**SP:** Stress and skipping sleep make it worse; resting helps.
**Student:** Thank you. *End of history.*

**ChatGPT (Examiner Mode):**
“You covered major features of migraine well but missed drug and family history.
**Score: 17/20 (Good).**”

**Optional ChatGPT Modes**

| **Mode** | **Description** |
| --- | --- |
| **SP-only** | ChatGPT acts as patient; examiner scores manually. |
| **Dual** | ChatGPT acts as patient → then examiner grades automatically. |
| **Training** | ChatGPT provides hint-based formative feedback after each question. |

**Sample Command to Start**

“ChatGPT, please start the AI-Simulated OSCE Station: Focused History – Headache.
Act as Ms. Sara Malik, 28 years old, school teacher with headache for 3 months.
Wait for my questions. When I say ‘End of history,’ switch to examiner mode and grade me out of 20.”

**TRADITIONAL HUMAN-SIMULATED OSCE STATION**

**Station Setup**

- **Environment:** OSCE cubicle or skills lab
- **SP:** Trained female standardized patient (*Ms. Sara Malik*)
- **Examiner:** Faculty member with rubric sheet
- **Duration:** 5 min history + 2 min examiner questioning

**Standardized Patient Script**

| **Aspect** | **Information** |
| --- | --- |
| **Name** | Ms. Sara Malik |
| **Age** | 28 years |
| **Occupation** | School teacher |
| **Chief Complaint** | Headache for 3 months |
| **Character** | Throbbing, right-sided |
| **Duration of Each Episode** | 4–6 hours |
| **Associated Symptoms** | Nausea, photophobia |
| **Triggers** | Stress, lack of sleep |
| **Relief** | Rest in dark room |
| **Family History** | Mother has similar headaches |
| **Medical History** | None significant |
| **Drugs** | Occasional paracetamol |
| **Social** | Overworked, stressed |
| **Closing Prompt** | “Doctor, is this something serious?” |

**Examiner Prompts (Optional Questions)**

1. **What is the most likely diagnosis?**
   → *Migraine without aura*
2. **What are the important red flags to rule out secondary causes?**
   → Sudden onset (thunderclap), neurological deficits, fever/neck stiffness, visual changes, raised ICP features, age >50.
3. **What initial investigations would you suggest?**
   → Blood pressure, fundoscopy, CBC, ESR (if temporal arteritis suspected), MRI/CT if atypical features.

**Examiner Notes**

- Award marks only for elicited and relevant questions.
- Allow equivalent phrasing (e.g., “light sensitivity” = “photophobia”).
- Deduct for disorganization or insensitive remarks.

**Sample Feedback Template**

“You demonstrated good rapport and logical questioning.
Missed caffeine and drug history.
Overall score: **8.5 / 10 (Good performance).**”

**OSCE Station: Focused History (Primary Infertility)**

**Station Title**

**Focused History from a Patient Presenting with Primary Infertility**

**Discipline**

Gynaecology (Integrated with Endocrinology and Psychiatry)

**Duration**

7 minutes (5 min history-taking + 2 min examiner questioning)

**Learning Objectives**

After completing this OSCE, learners will be able to:

1. Take a focused, structured, and empathetic history from a patient presenting with primary infertility.
2. Identify important reproductive, menstrual, sexual, endocrine, and psychosocial factors.
3. Demonstrate communication, empathy, and professionalism.
4. Suggest likely causes and initial investigations for infertility.

**Candidate Instructions (for both groups – AI & Human-Based Simulation)**

**Scenario**

You are a medical student in the Gynaecology OPD.
A 32-year-old woman presents with inability to conceive since marriage.

**Task**

Take a **focused infertility history** to identify possible causes.
You do **not** need to perform an examination.
You have **5 minutes** for the interview.
The examiner may ask **two follow-up questions** at the end.

**AI-SIMULATED OSCE STATION (ChatGPT Version)**

**Station Setup**

- **Platform:** ChatGPT (GPT-5)
- **Mode:** Interactive role-play
- **ChatGPT Role:** Mrs. Ayesha Khan (Standardized Patient) → then switches to Examiner Mode for scoring
- **Duration:** 5 min history + 2 min feedback

**Candidate Instructions (Displayed in ChatGPT)**

- You are a medical student in the Gynaecology OPD.
  You are interacting with Mrs. Ayesha Khan, a 32-year-old woman who has been married for 8 years and has never conceived.
  Take a focused history to identify possible causes.
  When you finish, say “End of history.” ChatGPT will then switch to examiner mode and grade your performance.

**ChatGPT System Setup Prompt**

You are ChatGPT acting as an AI Standardized Patient in an OSCE.

- Play Mrs. Ayesha Khan, 32 years old, married 8 years, no children.
- Provide realistic, concise answers *only when asked*.
- Maintain polite and slightly anxious tone.
- When the student says “End of history,” switch to examiner mode, use the rubric below (20 marks total), and give brief feedback.

**AI Standardized Patient Script**

| **Aspect** | **Information** |
| --- | --- |
| Name | Mrs. Ayesha Khan |
| Age | 32 years |
| Marital History | Married 8 years, no pregnancy |
| Menstrual History | Scanty menses every 3–4 months |
| Pain | No dysmenorrhoea |
| Discharge/Itching/Burning | None |
| Facial Hair | Yes |
| Weight | Gained in last 5 years |
| Galactorrhoea | No |
| Medical History | No DM or thyroid disease |
| Drugs | None |
| Psychosocial | Feels sad and anxious about infertility |
| Closing Prompt | “Doctor, can you help me understand why I can’t conceive?” |

**Examiner Checklist (AI or Human Use)**

| **#** | **Observation** | **Max Marks** |
| --- | --- | --- |
| **Communication & Professionalism** | | |
| 1 | Introduces self, confirms identity, seeks consent | 0.5 |
| 2 | Maintains eye contact, empathy, active listening | 0.5 |
| **Reproductive & Menstrual History** | | |
| 3 | Asks duration of marriage / infertility | 0.5 |
| 4 | Asks menstrual cycle pattern (flow, regularity, frequency) | 1 |
| 5 | Asks about dysmenorrhoea / pelvic pain | 0.5 |
| **Sexual & Infective History** | | |
| 6 | Asks about dyspareunia | 0.5 |
| 7 | Asks about discharge, itching, burning micturition, sores | 1 |
| 8 | Asks about past STIs or PID | 0.5 |
| **Endocrine & Medical History** | | |
| 9 | Asks about weight gain/loss | 0.5 |
| 10 | Asks about abnormal hair growth (acne, hirsutism) | 0.5 |
| 11 | Asks about galactorrhoea | 0.25 |
| 12 | Asks about thyroid/diabetes | 0.5 |
| 13 | Asks about drug intake (chemo, hormones) | 0.5 |
| 14 | Asks about eating disorder / dietary pattern | 0.25 |
| **Psychosocial & Closure** | | |
| 15 | Asks about stress, marital relationship, emotional impact | 0.5 |
| 16 | Summarizes findings logically | 1 |
| 17 | Suggests likely cause (e.g., PCOS, endocrine) | 1 |
| 18 | Mentions initial investigations | 2 |
| 19 | Reassures and explains next steps | 1 |
| 20 | Thanks patient politely | 0.5 |
| **TOTAL** |  | **20 marks** |

**Sample ChatGPT Interaction Flow**

**Student:** Hello, I’m Dr. [Name]. Can I ask you a few questions about your health?
**ChatGPT (SP):** Sure, doctor. I’ve been married for eight years and I still haven’t got pregnant.

**Student:** How are your periods?
**SP:** They’re very light and come every 3–4 months.

**Student:** Any pain or discharge?
**SP:** No, nothing unusual.

**Student:** Any weight change or facial hair?
**SP:** Yes, I’ve gained weight and noticed hair on my chin.

**Student:** Any milky discharge from the breasts?
**SP:** No.

**Student:** Thank you. (End of history)

**ChatGPT (Examiner Mode):**
“You covered menstrual and endocrine aspects well but missed psychosocial and drug history.
Score = 17 / 20 (Good).”

**Optional ChatGPT Modes**

| **Mode** | **Description** |
| --- | --- |
| SP-only | ChatGPT acts as patient; examiner scores manually using rubric. |
| Dual | ChatGPT acts as patient → then examiner automatically. |
| Training | After each student question, ChatGPT gives “hint” feedback (privately). |

**Sample Command to Start**

“ChatGPT, please start the AI-Simulated OSCE Station: Focused History – Primary Infertility.
Act as Mrs. Ayesha Khan, 32 years old, married 8 years, no children.
Wait for my questions.
When I say ‘End of history,’ switch to examiner mode and grade me out of 20.”

**TRADITIONAL HUMAN-SIMULATED OSCE STATION**

**Station Setup**

- Environment: OSCE cubicle or skills lab
- SP: Trained female Standardized Patient (Mrs. Ayesha Khan)
- Examiner: Faculty member with rubric sheet
- Duration: 5 min history + 2 min examiner questioning

**Standardized Patient Script**

| **Aspect** | **Information** |
| --- | --- |
| Name | Mrs. Ayesha Khan |
| Age | 32 years |
| Marital History | Married 8 years, no pregnancy |
| Menstrual History | Scanty menses every 3–4 months |
| Pain | No dysmenorrhoea |
| Discharge/Itching/Burning | None |
| Facial Hair | Yes |
| Weight | Gained in last 5 years |
| Galactorrhoea | No |
| Medical History | No DM or thyroid disease |
| Drugs | None |
| Psychosocial | Feels sad and anxious about infertility |
| Closing Prompt | “Doctor, can you help me understand why I can’t conceive?” |

**Examiner Prompts (Optional Questions)**

1️. **What is the most likely cause in this case?**
→ Anovulation due to Polycystic Ovary Syndrome (PCOS).

2️. **List initial investigations.**
→ LH/FSH ratio, prolactin, TSH, pelvic ultrasound, and husband’s semen analysis.

**Examiner Notes**

- Award marks only for elicited information.
- Allow equivalent phrasing (“hair growth on chin” = “hirsutism”).
- Deduct for disorganization or insensitivity.

**Sample Feedback Template**

“You demonstrated good rapport and logical flow. You missed asking about drug intake and eating habits. Overall score 8/10.”

**OSCE Station: Focused History**

**(Suspected Acute Kidney Injury)**

**Station Title**

Focused history from a patient with **oliguria and right flank discomfort** (possible **AKI**)

**Discipline**

Medicine (integrated with Pathology, Pharmacology, Surgery/Urology, Community Medicine)

**Duration**

**7 minutes** (5 min history-taking + 2 min examiner questioning)

**Learning Objectives**

After this OSCE, learners will be able to:

1. Take a **focused, structured, and empathetic history** from a patient with **possible AKI** (Curriculum: Med 79–85; Path 75–78).
2. **Differentiate prerenal, intrinsic renal, and postrenal** clues from history (Med 81).
3. Identify **red flags/complications** (hyperkalaemia, pulmonary oedema, sepsis) (Med 83).
4. Propose **initial investigations and immediate management** (Med 84–85; Surg/Uro 172–173; Radiol 165–169).

**Candidate Instructions (AI & Human-based Simulation)**

**Scenario**
You are a medical student in the Medical Emergency.
A **55-year-old man** presents with **reduced urine output for 2 days** and **right flank discomfort**.

**Task**
Take a **focused history** to identify the **likely cause of AKI** and any **urgent risks**.
No physical examination is required.
You have **5 minutes**. The examiner may ask **two follow-up questions** at the end.

**AI-SIMULATED OSCE STATION (ChatGPT Version)**

**Platform:** ChatGPT (GPT-5)
**Mode:** Interactive role-play
**ChatGPT Role:** *Mr. Imran Shah* (Standardized Patient) → switches to **Examiner Mode** for scoring
**Duration:** 5 min history + 2 min feedback

**Candidate Prompt (displayed to student)**

You are in Medical Emergency. Speak with **Mr. Imran Shah (55)**, presenting with **low urine output for 2 days** and **right flank discomfort**.
Take a focused history to determine the likely **AKI aetiology** and risks.
Say **“End of history.”** when done. ChatGPT will then grade you.

**System Setup Prompt (for the AI SP)**

You are an **AI Standardized Patient**.

- Play **Mr. Imran Shah, 55 y** with **oliguria** and **flank discomfort**.
- Answer only when asked; be cooperative and mildly anxious.
- When the student says **“End of history”**, switch to **Examiner Mode** and score using the checklist (20 marks) and give brief feedback.

**AI Standardized Patient Script (core responses)**

| **Aspect** | **Information** |
| --- | --- |
| Name/Age | Mr. Imran Shah, 55 |
| CC | “I am hardly passing urine for 2 days; right side back discomfort.” |
| Onset/course | Gradual oliguria; discomfort intermittent, dull |
| Fluid losses | 3 days of diarrhoea last week; poor oral intake |
| Nephrotoxins | Taking **ibuprofen** 400 mg tid for knee pain for 1 week; took **ACE-inhibitor** (enalapril) for HTN |
| Infection/UTI | Burning micturition and feverish 1 day; no frank haematuria |
| Obstruction | Poor stream, hesitancy, nocturia for months (**BPH symptoms**); no catheter |
| Co-morbidities | Hypertension; no diabetes |
| Contrast use | CT with contrast **not** done recently |
| Red flags | Breathlessness on lying flat last night (mild); no confusion |
| Meds | Enalapril, ibuprofen; no herbal remedies |
| Social | Adequate support; no IV drugs |
| Closing cue | “Doctor, is this kidney failure? Will I need dialysis?” |

**Examiner Checklist (use for AI or Human SP) — 20 marks**

**Communication & Structure (2 marks)**

1. Introduces self, confirms identity, seeks consent (0.5)
2. Empathy, active listening, organized flow (0.5)
3. Summarizes key points before closing (1)

**AKI Aetiology from History (8.5 marks)**
4. Onset, urine output change (oliguria/anuria) (0.5)
5. Volume loss/dehydration (vomiting/diarrhoea/poor intake) (1)
6. Nephrotoxic drugs (NSAIDs, ACEi, contrast, herbal) (1.5)
7. Infection/UTI features (dysuria, fever, flank pain) (1)
8. Obstruction symptoms (poor stream, hesitancy, retention, stones) (1.5)
9. Past renal disease/CKD & comorbidities (HTN/DM) (1)
10. Recent surgeries/trauma/sepsis (1)

**Complications / Red Flags (3 marks)**
11. Enquire breathlessness, chest pain, confusion, pruritus (1)
12. Ask for reduced appetite, nausea, metallic taste (uraemia) (1)
13. Enquire about decreased urine despite fluids / anuria (1)

**Investigations & Initial Management (6.5 marks)**
14. States initial tests: **serum creatinine/urea, electrolytes (K⁺)**, **urinalysis**, **CBC**, **ABG if ill** (2)
15. Bedside/Imaging: **ECG for hyperkalaemia**, **USG KUB** (post-renal) (2)
16. Initial plan: **stop nephrotoxins**, **fluid assessment & resuscitation if prerenal**, **treat sepsis/UTI**, **bladder scan/catheter if obstructed**, **early nephrology/urology referral** (2.5)

**Global rating (for moderation):** Excellent / Good / Borderline / Unsatisfactory.

**Sample AI Interaction Flow**

Student: “What brought you in today?”
SP: “I’m barely passing urine and my right side hurts.”
Student explores intake/diarrhoea → NSAIDs/ACEi → LUTS → dysuria/fever → red flags → sums up; proposes LFT/KFT, K⁺/ECG, UA, USG KUB; stop NSAID/ACEi; fluids; antibiotics if UTI; catheterize if retention.

**AI Examiner Feedback (example):**
“You covered nephrotoxins and obstruction well; you did not ask about contrast exposure and ABG. Score **16/20**.”

**Traditional Human-Simulated OSCE Station**

**Environment:** Skills lab cubicle
**SP:** Trained adult male (Mr. Imran Shah)
**Examiner:** Faculty with the same 20-mark checklist
**Timing:** 5 min + 2 min questions

**Optional Examiner Questions (1–2 min):**

1. **Classify the likely AKI** in this case and justify (mixed **prerenal**—volume depletion/NSAIDs—and **postrenal**—BPH).
2. **Name three absolute indications for urgent dialysis** (RRT 94–96): refractory hyperkalaemia, pulmonary oedema/volume overload, severe metabolic acidosis/uraemic complications (pericarditis/encephalopathy).

**Station Mapping to Curriculum Outcomes**

- **Pathology:** AKI aetiology/pathogenesis & drug-induced injury (75–78).
- **Medicine AKI:** define, criteria (KDIGO), causes pre/intra/post-renal, complications, investigations, management (79–85).
- **Radiology:** USG KUB, CT (165–169).
- **Surgery/Urology:** evaluation of obstruction, catheterization basics, stone/PUJO differentials (170–182).
- **Community/Family Medicine:** primary-care red flags and referral (106–108).
- **Pharmacology:** nephrotoxic drugs, antibiotic choices for UTI (144).

**OSCE Stations (Phase-2)**

**OSCE: Focused History – Meningitis**

**Discipline:**

Internal Medicine / Pathology / Community Medicine

**Duration:**

7 minutes total

- **5 minutes** – History taking
- **2 minutes** – Examiner questioning and feedback

**Learning Objectives**

By the end of this OSCE, the learner should be able to:

1. Take a focused and systematic history from a patient presenting with fever and headache suggestive of meningitis.
2. Differentiate between acute pyogenic and tuberculous meningitis based on key historical features.
3. Identify red-flag symptoms indicating raised intracranial pressure or complications (neck stiffness, photophobia, altered consciousness, seizures).
4. Formulate a provisionaldiagnosis and suggest relevant investigations and initial management steps.
5. Demonstrate effective communication, empathy, and professionalism during the encounter.

**AI-Simulated OSCE Station (ChatGPT Version)**

**Platform**

ChatGPT (GPT-5): Interactive AI-based Standardized Patient & Examiner

**Station Setup**

- **SP Role:** Mr. Rizwan Ali, 32 years old, salesman
- **Mode:** Interactive text-based dialogue (voice optional)
- **Sequence:**
  - ChatGPT acts as AI-Simulated Patient (SP).
  - When the candidate types “End of history”, ChatGPT automatically switches to Examiner Mode, grades the performance using the rubric, and provides concise feedback.

**Candidate Instructions**

You are a final-year medical student in the Medicine OPD.
Mr. Rizwan Ali, a 32-year-old salesman, presents with fever and headache for 5 days.
Your task is to take a focused history to identify the probable cause.

Physical examination is not required.
You have 5 minutes for the interview.
When you finish, say “End of history.”

**AI System Prompt (Pre-set in ChatGPT)**

You are ChatGPT acting as an AI Standardized Patient (SP) in an OSCE station.

- Role: Mr. Rizwan Ali, 32-year-old salesman with fever and severe headache for 5 days.
- Respond realistically, naturally, and concisely.
- Maintain a mildly distressed but cooperative tone.
- Provide additional symptoms only if asked.
- When the student says “End of history,” switch to Examiner Mode:
  - Evaluate the candidate using the 20-mark rubric below.
  - Give a brief summary of strengths, missed points, and total score.

**AI Standardized Patient Script**

| **Aspect** | **Information** |
| --- | --- |
| **Name** | Mr. Rizwan Ali |
| **Age** | 32 years |
| **Occupation** | Salesman |
| **Chief Complaint** | Fever and headache for 5 days |
| **Onset & Duration** | Sudden onset, high-grade intermittent fever; severe frontal headache |
| **Associated Symptoms** | Vomiting (twice), photophobia, neck stiffness |
| **Negative Symptoms** | No ear discharge, rash, trauma, or seizures |
| **Past Medical History** | No tuberculosis, diabetes, or hypertension |
| **Drug History** | Took paracetamol; no regular medication |
| **Family / Contact History** | No known TB contact; two hostel roommates recently had flu |
| **Social History** | Lives in hostel; non-smoker, no alcohol |
| **Red Flags** | Drowsy episode yesterday evening, improved after rest |
| **Closing Prompt** | “Doctor, do you think this could be something serious like infection in the brain?” |

**Examiner Checklist and Rubric (20 marks)**

| **#** | **Observation / Behaviour** | **Max Marks** |
| --- | --- | --- |
| **Communication & Professionalism** | | |
| 1 | Introduces self, confirms identity, seeks consent | 0.5 |
| 2 | Maintains eye contact, empathy, and active listening throughout | 0.5 |
| **History of Presenting Complaint** | | |
| 3 | Asks onset, duration, and progression of fever and headache | 0.5 |
| 4 | Explores site, character, and severity of headache (e.g., generalized, throbbing) | 1 |
| 5 | Asks about temporal pattern, aggravating and relieving factors | 0.5 |
| 6 | Explores associated symptoms: nausea, vomiting, photophobia, neck stiffness | 1 |
| 7 | Asks about presence of fever pattern (high grade, intermittent, chills/rigors) | 1 |
| **Screening for Red Flags** | | |
| 8 | Screens for altered sensorium, confusion, or drowsiness | 1 |
| 9 | Asks for seizures, focal neurological deficits, rash, trauma, or ear/nasal discharge | 1 |
| **Past, Family & Contact History** | | |
| 10 | Asks about history of tuberculosis or chronic illness (HIV, DM) | 0.5 |
| 11 | Asks about contact with TB patient or recent infection exposure | 0.5 |
| 12 | Asks about vaccination status (e.g., meningococcal, BCG) | 0.5 |
| **Drug & Social History** | | |
| 13 | Asks about recent antibiotic or analgesic use | 0.5 |
| 14 | Asks about living conditions (e.g., hostel, crowding), travel, or occupation | 0.5 |
| **Summary & Diagnostic Reasoning** | | |
| 15 | Summarizes findings in logical sequence | 1 |
| 16 | Suggests likely diagnosis (e.g., *acute pyogenic meningitis*) | 1 |
| 17 | Mentions key differential (e.g., *tuberculous meningitis*, *encephalitis*) | 1 |
| 18 | Suggests relevant investigations (CBC, CSF, neuroimaging before LP if ICP↑) | 1 |
| 19 | Outlines immediate management (empiric antibiotics, fluids, isolation if indicated) | 1 |
| 20 | Provides reassurance, explains seriousness empathetically, and thanks patient | 0.5 |
| **TOTAL** | | **20 marks** |

**Sample ChatGPT Dialogue Flow**

**Student:** Hello, I’m Dr. [Name], a final-year medical student. May I confirm your name and age?
**AI (SP):** I’m Rizwan Ali, 32 years old.

**Student:** Can you tell me what brings you here today?
**AI (SP):** I’ve had fever and a really bad headache for about five days now.

**Student:** Was it sudden or gradual?
**AI (SP):** It started suddenly, and the fever goes up and down.

**Student:** Any nausea, vomiting, or light sensitivity?
**AI (SP):** Yes, I vomited a couple of times and light really hurts my eyes.

**Student:** Have you felt any stiffness in your neck or drowsiness?
**AI (SP):** My neck feels stiff, and yesterday evening I was a bit drowsy.

**Student:** Any history of TB or contact with someone having TB?
**AI (SP):** No, not that I know of.

**Student:** Thank you. *End of history.*

**ChatGPT (Examiner Mode):**

You covered major presenting and red-flag symptoms well but missed contact and vaccination history. Communication clear and empathetic.
Score: **17 / 20 (Good performance).**

**Human-Simulated OSCE Station**

**Station Setup**

- **Environment:** Skills lab / OSCE cubicle
- **SP:** Trained male actor (same script as above)
- **Examiner:** Faculty from Medicine or Pathology, equipped with rubric sheet
- **Duration:** 5 min history + 2 min examiner questioning

**Standardized Patient Script (Human SP)**

| **Aspect** | **Information** |
| --- | --- |
| **Name** | Mr. Rizwan Ali |
| **Age** | 32 years |
| **Occupation** | Salesman |
| **Chief Complaint** | Fever and headache for 5 days |
| **Fever** | Sudden, high-grade, intermittent |
| **Headache** | Severe, frontal, continuous; worsens with bright light |
| **Associated** | Nausea, vomiting, photophobia |
| **Negatives** | No rash, no ear discharge, no trauma |
| **Red Flags** | Mild confusion last night |
| **PMH** | No TB, DM, or chronic illness |
| **Social** | Lives in hostel; no substance use |
| **Closing line** | “Doctor, is this something dangerous?” |

**Examiner Prompts (for 2-minute questioning phase)**

1. **What type of meningitis is most likely?**
   → *Acute pyogenic meningitis.*
2. **Which investigations would you order to confirm the diagnosis?**
   → *CBC, blood culture, lumbar puncture for CSF analysis (cell count, protein, glucose, Gram stain, culture), neuroimaging if raised ICP suspected.*
3. **Outline the initial management steps.**
   → *Empiric IV antibiotics (e.g., ceftriaxone + vancomycin), IV fluids, antipyretics, isolation if needed, notify public health if meningococcal.*

**Human Examiner Rubric (Same 20-mark criteria)**

| **#** | **Observation / Behaviour** | **Max Marks** |
| --- | --- | --- |
| **Communication & Professionalism** | | |
| 1 | Introduces self, confirms identity, seeks consent | 0.5 |
| 2 | Maintains eye contact, empathy, and active listening throughout | 0.5 |
| **History of Presenting Complaint** | | |
| 3 | Asks onset, duration, and progression of fever and headache | 0.5 |
| 4 | Explores site, character, and severity of headache (e.g., generalized, throbbing) | 1 |
| 5 | Asks about temporal pattern, aggravating and relieving factors | 0.5 |
| 6 | Explores associated symptoms: nausea, vomiting, photophobia, neck stiffness | 1 |
| 7 | Asks about presence of fever pattern (high grade, intermittent, chills/rigors) | 1 |
| **Screening for Red Flags** | | |
| 8 | Screens for altered sensorium, confusion, or drowsiness | 1 |
| 9 | Asks for seizures, focal neurological deficits, rash, trauma, or ear/nasal discharge | 1 |
| **Past, Family & Contact History** | | |
| 10 | Asks about history of tuberculosis or chronic illness (HIV, DM) | 0.5 |
| 11 | Asks about contact with TB patient or recent infection exposure | 0.5 |
| 12 | Asks about vaccination status (e.g., meningococcal, BCG) | 0.5 |
| **Drug & Social History** | | |
| 13 | Asks about recent antibiotic or analgesic use | 0.5 |
| 14 | Asks about living conditions (e.g., hostel, crowding), travel, or occupation | 0.5 |
| **Summary & Diagnostic Reasoning** | | |
| 15 | Summarizes findings in logical sequence | 1 |
| 16 | Suggests likely diagnosis (e.g., *acute pyogenic meningitis*) | 1 |
| 17 | Mentions key differential (e.g., *tuberculous meningitis*, *encephalitis*) | 1 |
| 18 | Suggests relevant investigations (CBC, CSF, neuroimaging before LP if ICP↑) | 1 |
| 19 | Outlines immediate management (empiric antibiotics, fluids, isolation if indicated) | 1 |
| 20 | Provides reassurance, explains seriousness empathetically, and thanks patient | 0.5 |
| **TOTAL** | | **20 marks** |

**Examiner Notes**

- Award 0.25 increments where partial credit is justified.
- Accept clinically equivalent terms (“light sensitivity” = “photophobia”).
- Deduct for rushed or insensitive communication.
- Apply same sheet for AI and Human stations for comparative reliability analysis.

**Sample Examiner Feedback**

“You established good rapport and elicited key features of pyogenic meningitis.
You could have explored contact history and vaccination.
Logical flow, confident summary.
**Score: 17.5 / 20 (Good).**”

**OSCE: Focused History – Scrotal Swelling and Urinary Symptoms**

**Discipline:**
Integrated — *Pathology / Pharmacology / Forensic Medicine*

**Duration:**
7 minutes total

- 5 min: Focused History
- 2 min: Examiner questioning

**Learning Objectives**

After completing this OSCE, the learner will be able to:

1. Take a focused history from a male patient presenting with scrotal swelling or lower urinary symptoms.
2. Differentiate between key causes — *testicular tumor, epididymo-orchitis, hydrocele, prostatitis, BPH, prostatic carcinoma.*
3. Identify red-flag features (e.g., hard painless mass, hematuria, weight loss, bone pain).
4. Formulate a provisional diagnosis, investigations, and management plan.
5. Demonstrate empathy, professionalism, and clinical reasoning.

**AI-Simulated OSCE Station (ChatGPT Version)**

**Platform:** ChatGPT (GPT-5)
**Role:** AI Standardized Patient (SP) + Examiner

**System Prompt Setup**

You are ChatGPT acting as an AI Standardized Patient (SP) in an OSCE station.
Play *Mr. Kamran Ali*, a 45-year-old bank employee presenting with scrotal swelling and urinary difficulty.
Respond realistically and briefly. Maintain a cooperative tone with mild concern.
When the student says **“End of history”**, switch to **Examiner Mode** to grade the candidate using the rubric and provide a short narrative feedback summary.

**Candidate Instructions**

You are a final-year medical student in the Urology OPD.
Mr. Kamran Ali, aged 45, presents with scrotal swelling and urinary difficulty.
Take a focused history to identify the likely cause.
Physical examination is **not required**.
You have **5 minutes**. When finished, say *“End of history.”*

**AI Standardized Patient Script**

| **Aspect** | **Information** |
| --- | --- |
| **Name / Age / Occupation** | Mr. Kamran Ali, 45 years, bank employee |
| **Chief Complaint** | Scrotal swelling for 2 months; difficulty in passing urine for 3 weeks |
| **Onset & Duration** | Gradual; painless |
| **Character** | Hard swelling in right testis, not reducible |
| **Associated Symptoms** | Feeling of heaviness; increased frequency and poor urine stream; occasional burning |
| **Systemic / Red Flags** | Loss of appetite, mild back pain, weight loss over 2 months |
| **No** | Fever, trauma, dysuria, or urethral discharge |
| **Past History** | No prior surgery; no STDs |
| **Drug / Social History** | Smokes occasionally; no alcohol |
| **Family History** | No malignancy |
| **Closing Prompt** | “Doctor, could this be something serious like cancer?” |

**Examiner Checklist & Rubric (20 marks)**

| **#** | **Observation / Behaviour** | **Max Marks** | **Marks Obtained** |
| --- | --- | --- | --- |
| **Communication & Professionalism** |  |  |  |
| 1 | Introduces self, confirms identity, seeks consent | 0.5 |  |
| 2 | Maintains empathy, clear communication, active listening | 0.5 |  |
| **History of Presenting Complaint** |  |  |  |
| 3 | Asks onset, duration, and progression of swelling | 0.5 |  |
| 4 | Asks site, laterality, character (painful/painless, consistency) | 1 |  |
| 5 | Asks about associated urinary symptoms (frequency, stream, hesitancy) | 1 |  |
| 6 | Asks about systemic symptoms (fever, malaise, weight loss) | 1 |  |
| **Screening for Red Flags** |  |  |  |
| 7 | Screens for hematuria, back pain, bony pain | 1 |  |
| 8 | Screens for trauma, infection, or urethral discharge | 0.5 |  |
| **Past / Drug / Family / Social History** |  |  |  |
| 9 | Asks about STDs, trauma, previous surgery, infertility | 0.5 |  |
| 10 | Asks about smoking, alcohol, occupational exposures | 0.5 |  |
| 11 | Asks about family history of malignancy or prostate disease | 0.5 |  |
| **Diagnostic Reasoning** |  |  |  |
| 12 | Summarizes key findings logically | 1 |  |
| 13 | Suggests likely diagnosis (e.g., testicular tumor / BPH / carcinoma prostate) | 2 |  |
| **Investigations** |  |  |  |
| 14 | Suggests appropriate tests (USG scrotum, serum AFP/β-hCG, PSA, TRUS, biopsy) | 2 |  |
| **Initial Management & Counselling** |  |  |  |
| 15 | Explains need for imaging, tumor markers, and possible surgical referral | 1 |  |
| 16 | Provides reassurance, addresses concern empathetically | 1 |  |
| **TOTAL** |  | **20** |  |

**Sample AI Dialogue Flow**

**Student:** Hello, I’m Dr. [Name]. May I confirm your name and what brings you in today?
**AI (SP):** I’m Kamran Ali. I’ve noticed swelling in my right testicle for a couple of months.

**Student:** Is it painful?
**SP:** No, it’s not painful—just heavy.

**Student:** Any urinary problems?
**SP:** Yes, I feel I can’t empty my bladder fully and the stream is weak.

**Student:** Any weight loss or back pain?
**SP:** Yes, a bit of both lately.

**Student:** End of history.
**ChatGPT (Examiner Mode):**
“You elicited duration, laterality, urinary and systemic features well. Missed drug and family history. Logical summary. Score: **17 / 20 (Good performance).**”

**Human-Simulated OSCE Station**

**Setup:**

- **Environment:** Skills lab / OSCE cubicle
- **SP:** Trained male actor (same script)
- **Examiner:** Faculty member using the same 20-mark rubric

**Standardized Patient Script (Human SP)**

| **Aspect** | **Information** |
| --- | --- |
| **Name / Age / Occupation** | Mr. Kamran Ali, 45 years, bank employee |
| **Chief Complaint** | Scrotal swelling for 2 months; difficulty in passing urine for 3 weeks |
| **Onset & Duration** | Gradual; painless |
| **Character** | Hard swelling in right testis, not reducible |
| **Associated Symptoms** | Feeling of heaviness; increased frequency and poor urine stream; occasional burning |
| **Systemic / Red Flags** | Loss of appetite, mild back pain, weight loss over 2 months |
| **No** | Fever, trauma, dysuria, or urethral discharge |
| **Past History** | No prior surgery; no STDs |
| **Drug / Social History** | Smokes occasionally; no alcohol |
| **Family History** | No malignancy |
| **Closing Prompt** | “Doctor, could this be something serious like cancer?” |

**Examiner Checklist & Rubric (20 marks)**

| **#** | **Observation / Behaviour** | **Max Marks** | **Marks Obtained** |
| --- | --- | --- | --- |
| **Communication & Professionalism** | | | |
| 1 | Introduces self, confirms identity, seeks consent | 0.5 |  |
| 2 | Maintains empathy, clear communication, active listening | 0.5 |  |
| **History of Presenting Complaint** | | | |
| 3 | Asks onset, duration, and progression of swelling | 0.5 |  |
| 4 | Asks site, laterality, character (painful/painless, consistency) | 1 |  |
| 5 | Asks about associated urinary symptoms (frequency, stream, hesitancy) | 1 |  |
| 6 | Asks about systemic symptoms (fever, malaise, weight loss) | 1 |  |
| **Screening for Red Flags** | | | |
| 7 | Screens for hematuria, back pain, bony pain | 1 |  |
| 8 | Screens for trauma, infection, or urethral discharge | 0.5 |  |
| **Past / Drug / Family / Social History** | | | |
| 9 | Asks about STDs, trauma, previous surgery, infertility | 0.5 |  |
| 10 | Asks about smoking, alcohol, occupational exposures | 0.5 |  |
| 11 | Asks about family history of malignancy or prostate disease | 0.5 |  |
| **Diagnostic Reasoning** | | | |
| 12 | Summarizes key findings logically | 1 |  |
| 13 | Suggests likely diagnosis (e.g., testicular tumor / BPH / carcinoma prostate) | 2 |  |
| **Investigations** | | | |
| 14 | Suggests appropriate tests (USG scrotum, serum AFP/β-hCG, PSA, TRUS, biopsy) | 2 |  |
| **Initial Management & Counselling** | | | |
| 15 | Explains need for imaging, tumor markers, and possible surgical referral | 1 |  |
| 16 | Provides reassurance, addresses concern empathetically | 1 |  |
| **TOTAL** | | **20** |  |

**Examiner Prompts (2-minute Question Phase)**

1. What is the **most likely diagnosis**?
    → *Testicular tumor (possible seminoma) with suspected metastasis.*
2. What **investigations** would you order?
    → *USG scrotum, serum AFP/β-hCG, LDH, chest X-ray, CT abdomen/pelvis.*
3. What are the **initial management steps**?
    → *Surgical referral for orchidectomy, staging, tumor marker monitoring.*

**Sample Examiner Feedback**

“Good empathy and structured history. Missed smoking and family history. Excellent diagnostic reasoning.
**Score: 18 / 20 (Very good).**”

**✳️ Optional Pre/Post-Test Key Feature Questions**

**Pre-Test**

1. A painless, firm testicular swelling with raised β-hCG indicates:
    A. Hydrocele B. Epididymo-orchitis C. Seminoma D. Varicocele E. Testicular torsion F. Hernia **→ C**
2. Enumerate two tumor markers used in diagnosis of testicular malignancy.
    **Answer:** *Alpha-fetoprotein (AFP), β-hCG.*

**Post-Test**

1. A 68-year-old male presents with poor urinary stream and nocturia. Which test differentiates BPH from prostate cancer?
    A. Serum PSA B. Urine culture C. Ultrasound D. Uroflowmetry E. MRI pelvis F. TRUS biopsy **→ F**
2. List **three complications** of untreated benign prostatic hyperplasia.
    **Answer:** *Urinary retention, recurrent UTIs, bladder diverticulum / hydronephrosis.*

**OSCE: Focused History – Pain in Right Upper Abdomen**

**Discipline**

Integrated: Internal Medicine / Pathology / Pharmacology / Community Medicine

**Duration**

7 minutes (5 min history + 2 min examiner questioning)

**Learning Objectives**

After completing this OSCE, the learner will be able to:

1. Take a focused history from a patient presenting with right upper quadrant (RUQ) pain.
2. Differentiate between common hepatobiliary and pancreatic causes (hepatitis, cholecystitis, gallstones, liver abscess, pancreatitis).
3. Identify red-flag symptoms suggestive of serious pathology (e.g., obstructive jaundice, cholangitis, perforation, hepatic failure).
4. Formulate a provisional diagnosis, propose relevant investigations, and suggest initial management.
5. Demonstrate empathy, professionalism, and clinical reasoning during the encounter.

**AI-Simulated OSCE Station (ChatGPT Version)**

**Platform**

ChatGPT (GPT-5) – AI Standardized Patient + Examiner

**System Setup Prompt**

You are ChatGPT acting as an AI Standardized Patient (SP) in an OSCE station.
Role: **Mrs. Sadia Khan**, 40 years old, schoolteacher with **pain in the right upper abdomen for 4 days**.
Respond realistically and briefly. Maintain mild discomfort but cooperative tone.
Provide extra details only when asked.
When the student says **“End of history,”** switch to Examiner Mode:

- Evaluate performance using the rubric (20 marks)
- Provide a short narrative feedback summary.

**Candidate Instructions**

You are a final-year medical student in the Medicine OPD.
Your patient, Mrs. Sadia Khan (40 yrs), complains of right-upper-quadrant pain for 4 days.
Take a focused history to identify the likely cause.
Physical examination is not required.
You have 5 minutes for history taking; when finished, say “End of history.”

**AI Standardized Patient Script**

| **Aspect** | **Information** |
| --- | --- |
| **Name / Age / Occupation** | Mrs. Sadia Khan, 40 y, teacher |
| **Chief Complaint** | Pain in right upper abdomen × 4 days |
| **Onset / Character** | Gradual onset, dull aching, localized below right ribs |
| **Radiation** | Occasionally radiates to right shoulder |
| **Associated Symptoms** | Fever, nausea, decreased appetite |
| **Aggravating / Relieving** | Worse after fatty meals; relieved slightly by rest |
| **Jaundice / Urine / Stool** | Yellow eyes since yesterday, dark urine, pale stool |
| **Past History** | No previous liver disease or surgery |
| **Drug / Social History** | Occasional paracetamol; no alcohol; eats street food frequently |
| **Family History** | None significant |
| **Red Flags** | Mild confusion last night, increasing abdominal distension |
| **Closing Prompt** | “Doctor, will I need an operation for this pain?” |

**Examiner Checklist and Rubric (20 marks)**

| **#** | **Observation / Behaviour** | **Max Marks** | **Marks Obtained** |
| --- | --- | --- | --- |
| **Communication & Professionalism** | | | |
| 1 | Introduces self, confirms patient identity, seeks consent | 0.5 |  |
| 2 | Uses polite, empathic, and attentive communication style | 0.5 |  |
| 3 | Maintains logical flow, clear speech, and active listening | 1 |  |
| **History of Presenting Complaint** | | | |
| 4 | Asks onset and duration of pain | 0.5 |  |
| 5 | Explores site, radiation, and character of pain | 1 |  |
| 6 | Asks about severity (pain scale or daily impact) | 0.5 |  |
| 7 | Enquires about precipitating and relieving factors | 0.5 |  |
| 8 | Clarifies associated symptoms (relation to meals, posture, etc.) | 0.5 |  |
| **Associated Features** | | | |
| 9 | Asks about fever, nausea, vomiting | 1 |  |
| 10 | Asks about yellow eyes/skin, dark urine, or pale stool | 1 |  |
| 11 | Asks about appetite, fatigue, or weight changes | 1 |  |
| **Screening for Red Flags** | | | |
| 12 | Screens for altered consciousness, abdominal distension | 1 |  |
| 13 | Asks about GI bleeding, severe weight loss, or confusion | 1 |  |
| **Past / Drug / Family / Social History** | | | |
| 14 | Enquires about history of hepatitis, transfusions, travel, IV drugs | 0.5 |  |
| 15 | Asks about alcohol intake, hepatotoxic drugs (e.g., paracetamol) | 0.5 |  |
| 16 | Asks about family history of liver disease or jaundice | 0.5 |  |
| 17 | Asks about occupation, hygiene, or diet (risk exposures) | 0.5 |  |
| **Diagnostic Reasoning** | | | |
| 18 | Summarizes key findings coherently | 1 |  |
| 19 | Suggests likely diagnosis (e.g., acute cholecystitis, hepatitis, liver abscess) | 2 |  |
| **Investigations** | | | |
| 20 | Mentions relevant investigations (CBC, LFTs, USG, viral markers) | 2 |  |
| **Initial Management & Counselling** | | | |
| 21 | Outlines basic management (analgesia, hydration, antibiotics if indicated) | 1 |  |
| 22 | Advises referral or hospitalization if severe (obstructive jaundice/abscess) | 1 |  |
| **Professional Closure** | | | |
| 23 | Provides reassurance, answers patient’s question, thanks politely | 1 |  |
| **TOTAL** | | **20** |  |

**Sample AI Dialogue Flow**

**Student:** Hello, I’m Dr. [Name]. May I confirm your name and age?
**AI (SP):** I’m Sadia Khan, 40.
**Student:** Tell me more about your pain.
**SP:** It’s dull, on the right side under my ribs, started four days ago.
**Student:** Does it get worse after meals?
**SP:** Yes, especially after oily food.
**Student:** Any vomiting, fever, or yellowing of eyes?
**SP:** Yes, slight fever and my eyes turned yellow yesterday.
**Student:** Any previous liver disease?
**SP:** No.
**Student:** End of history.

**ChatGPT (Examiner Mode):**

You elicited key symptoms and risk factors well but missed medication history. Logical flow. Score = 18 / 20 (Good performance).

**Human-Simulated OSCE Station**

**Station Setup**

- **Environment:** Skills Lab / OSCE cubicle
- **SP:** Trained female actor (same script)
- **Examiner:** Faculty member with printed rubric
- **Duration:** 5 min history + 2 min examiner questioning

**Standardized Patient Script (Human SP)**

| **Aspect** | **Information** |
| --- | --- |
| Name | Mrs. Sadia Khan |
| Age | 40 years |
| Occupation | Teacher |
| Chief Complaint | Pain right upper abdomen × 4 days |
| Character | Dull, localized under right ribs, radiates to right shoulder |
| Associated | Fever, nausea, mild jaundice |
| Negatives | No vomiting of blood, no prior surgery |
| PMH | No hepatitis, no diabetes |
| Social | No alcohol, eats outside often |
| Red Flags | Increasing distension, mild confusion |
| Closing line | “Doctor, will this go away with medicine or do I need surgery?” |

**Examiner Checklist and Rubric (20 marks)**

| **#** | **Observation / Behaviour** | **Max Marks** | **Marks Obtained** |
| --- | --- | --- | --- |
| **Communication & Professionalism** | | | |
| 1 | Introduces self, confirms patient identity, seeks consent | 0.5 |  |
| 2 | Uses polite, empathic, and attentive communication style | 0.5 |  |
| 3 | Maintains logical flow, clear speech, and active listening | 1 |  |
| **History of Presenting Complaint** | | | |
| 4 | Asks onset and duration of pain | 0.5 |  |
| 5 | Explores site, radiation, and character of pain | 1 |  |
| 6 | Asks about severity (pain scale or daily impact) | 0.5 |  |
| 7 | Enquires about precipitating and relieving factors | 0.5 |  |
| 8 | Clarifies associated symptoms (relation to meals, posture, etc.) | 0.5 |  |
| **Associated Features** | | | |
| 9 | Asks about fever, nausea, vomiting | 1 |  |
| 10 | Asks about yellow eyes/skin, dark urine, or pale stool | 1 |  |
| 11 | Asks about appetite, fatigue, or weight changes | 1 |  |
| **Screening for Red Flags** | | | |
| 12 | Screens for altered consciousness, abdominal distension | 1 |  |
| 13 | Asks about GI bleeding, severe weight loss, or confusion | 1 |  |
| **Past / Drug / Family / Social History** | | | |
| 14 | Enquires about history of hepatitis, transfusions, travel, IV drugs | 0.5 |  |
| 15 | Asks about alcohol intake, hepatotoxic drugs (e.g., paracetamol) | 0.5 |  |
| 16 | Asks about family history of liver disease or jaundice | 0.5 |  |
| 17 | Asks about occupation, hygiene, or diet (risk exposures) | 0.5 |  |
| **Diagnostic Reasoning** | | | |
| 18 | Summarizes key findings coherently | 1 |  |
| 19 | Suggests likely diagnosis (e.g., acute cholecystitis, hepatitis, liver abscess) | 2 |  |
| **Investigations** | | | |
| 20 | Mentions relevant investigations (CBC, LFTs, USG, viral markers) | 2 |  |
| **Initial Management & Counselling** | | | |
| 21 | Outlines basic management (analgesia, hydration, antibiotics if indicated) | 1 |  |
| 22 | Advises referral or hospitalization if severe (obstructive jaundice/abscess) | 1 |  |
| **Professional Closure** | | | |
| 23 | Provides reassurance, answers patient’s question, thanks politely | 1 |  |
| **TOTAL** | | **20** |  |

**Examiner Prompts (2-min Question Phase)**

1. What is the **most likely diagnosis**?
    → *Acute cholecystitis / obstructive jaundice (gallstones).*
2. What **investigations** would you order?
    → *CBC, LFTs, serum amylase/lipase, ultrasound abdomen.*
3. Outline **initial management**.
    → *IV fluids, analgesia, antibiotics, NPO, surgical referral if indicated.*

**Sample Examiner Feedback**

“Good rapport and logical questioning.
Missed colour of urine/stool and red-flag screening.
Clear differential reasoning.
Score = 17.5 / 20 (Good).”

**OSCE: Acute Kidney Injury (AKI) and Renal Function**

**Integrated Disciplines:**
Pathology | Medicine | Surgery | Forensic | Family | Community Medicine

**Duration:** 7 min (5 min history + 2 min examiner discussion)

**Learning Objectives**

After completing this OSCE, the learner will be able to

1. Elicit focused history from a patient presenting with **oliguria or acute renal failure**.
2. Differentiate **prerenal, intrinsic, and post-renal** causes.
3. Interpret key **biochemical markers** (BUN, creatinine, electrolytes).
4. Outline initial **investigations, management, and referral criteria**.
5. Demonstrate **professionalism and empathetic communication**.

**AI-Simulated OSCE Station**

**Platform:** ChatGPT (GPT-5)
**Role:** AI Standardized Patient + Examiner

**System Prompt Setup**

You are ChatGPT acting as an AI Standardized Patient (SP) in an OSCE.
Play *Mr. Fahad Khan*, a 58-year-old diabetic hypertensive man presenting with **decreased urine output and swelling** for 3 days.
Respond briefly but realistically; show mild anxiety and shortness of breath.
When the student types **“End of history”**, switch to Examiner Mode → grade using rubric (20 marks) and give narrative feedback.

**Candidate Instructions**

You are a final-year MBBS student in the medical ward.
Mr. Fahad Khan (58 y) complains of **decreased urine output and leg swelling**.
Take a focused history to identify the cause.
Physical exam not required. You have 5 min; say *“End of history”* when finished.

**AI Standardized Patient Script**

| **Aspect** | **Information** |
| --- | --- |
| Name / Age / Occupation | Mr. Fahad Khan, 58 y, school principal |
| Chief Complaint | Decreased urine output × 3 days + leg swelling |
| Onset & Duration | Gradual; urine output ≈ 100 mL/day |
| Associated Symptoms | Nausea, fatigue, mild breathlessness, ankle edema |
| Systemic / Red Flags | No fever or burning micturition; no hematuria |
| Past History | HTN × 10 y (on ACE inhibitor), DM × 8 y |
| Drug / Social History | Analgesic use for joint pain; no alcohol |
| Family History | Brother on dialysis (CKD) |
| Closing Prompt | “Doctor, will I need dialysis like my brother?” |

**Examiner Checklist & Rubric (20 marks)**

| **#** | **Observation / Behaviour** | **Max Marks** | **Marks** |
| --- | --- | --- | --- |
| **Communication & Professionalism** | | | |
| 1 | Introduces self, obtains consent | 0.5 |  |
| 2 | Shows empathy, listens actively | 0.5 |  |
| **History of Presenting Complaint** | | | |
| 3 | Asks onset, duration, progression of oliguria | 0.5 |  |
| 4 | Quantifies urine output, color, frequency | 1 |  |
| 5 | Asks about edema, nausea, vomiting, dyspnea | 1 |  |
| 6 | Asks about fever, burning, flank pain | 0.5 |  |
| **Screening for Red Flags** | | | |
| 7 | Enquires about NSAID use, contrast exposure, dehydration | 1 |  |
| 8 | Asks about urinary retention or prostatic symptoms | 1 |  |
| **Past / Family History** | | | |
| 9 | Explores DM/HTN, nephrotoxic drugs, family CKD | 1 |  |
| **Diagnostic Reasoning** | | | |
| 10 | Summarizes findings logically | 1 |  |
| 11 | Suggests likely diagnosis (e.g. AKI on CKD, Prerenal AKI) | 2 |  |
| **Investigations & Management** | | | |
| 12 | Mentions RFTs (urea, creatinine, electrolytes), urinalysis, USG KUB | 2 |  |
| 13 | Outlines initial management (fluid balance, stop ACEI/NSAIDs, monitor K⁺) | 2 |  |
| **Closure & Counselling** | | | |
| 14 | Addresses dialysis question empathetically and reassures | 1 |  |
| **TOTAL** | | **20** |  |

**AI Dialogue Flow Example**

**Student:** Hello Mr. Khan, I’m Dr. [Name]; what brings you today?
**SP:** Doctor, my urine output has decreased for the last three days and my legs are swollen.
**Student:** Any pain or fever?
**SP:** No pain or fever. Just tired and a bit breathless.
**Student:** Are you on any medications?
**SP:** Yes, for blood pressure and diabetes; I take painkillers sometimes.
**Student:** End of history.
**ChatGPT (Examiner Mode):**
“You elicited renal symptoms and drug history well. Missed hydration and voiding questions. Score = 17 / 20.”

**Human-Simulated OSCE**

**Setup:** Ward cubicle / skills lab | SP: trained male actor | Examiner: faculty using same rubric

**SP Script**

| **Aspect** | **Information** |
| --- | --- |
| Name / Age / Occupation | Mr. Fahad Khan, 58 y, school principal |
| Chief Complaint | Decreased urine output × 3 days + leg swelling |
| Onset & Duration | Gradual; urine output ≈ 100 mL/day |
| Associated Symptoms | Nausea, fatigue, mild breathlessness, ankle edema |
| Systemic / Red Flags | No fever or burning micturition; no hematuria |
| Past History | HTN × 10 y (on ACE inhibitor), DM × 8 y |
| Drug / Social History | Analgesic use for joint pain; no alcohol |
| Family History | Brother on dialysis (CKD) |
| Closing Prompt | “Doctor, will I need dialysis like my brother?” |

**Examiner Checklist & Rubric (20 marks)**

| **#** | **Observation / Behaviour** | **Max Marks** | **Marks** |
| --- | --- | --- | --- |
| **Communication & Professionalism** | | | |
| 1 | Introduces self, obtains consent | 0.5 |  |
| 2 | Shows empathy, listens actively | 0.5 |  |
| **History of Presenting Complaint** | | | |
| 3 | Asks onset, duration, progression of oliguria | 0.5 |  |
| 4 | Quantifies urine output, color, frequency | 1 |  |
| 5 | Asks about edema, nausea, vomiting, dyspnea | 1 |  |
| 6 | Asks about fever, burning, flank pain | 0.5 |  |
| **Screening for Red Flags** | | | |
| 7 | Enquires about NSAID use, contrast exposure, dehydration | 1 |  |
| 8 | Asks about urinary retention or prostatic symptoms | 1 |  |
| **Past / Family History** | | | |
| 9 | Explores DM/HTN, nephrotoxic drugs, family CKD | 1 |  |
| **Diagnostic Reasoning** | | | |
| 10 | Summarizes findings logically | 1 |  |
| 11 | Suggests likely diagnosis (e.g. AKI on CKD, Prerenal AKI) | 2 |  |
| **Investigations & Management** | | | |
| 12 | Mentions RFTs (urea, creatinine, electrolytes), urinalysis, USG KUB | 2 |  |
| 13 | Outlines initial management (fluid balance, stop ACEI/NSAIDs, monitor K⁺) | 2 |  |
| **Closure & Counselling** | | | |
| 14 | Addresses dialysis question empathetically and reassures | 1 |  |
| **TOTAL** | | **20** |  |

**Examiner Prompts (2 min)**

1. What type of renal failure is suspected? → AKI (possibly prerenal / NSAID-induced).
2. Key investigations? → RFTs, electrolytes, urinalysis, ultrasound KUB, ECG (for K⁺).
3. Immediate management? → Stop nephrotoxins, maintain fluids, monitor output & K⁺, consider RRT if indicated.
